# Supplementary material for: Assessing the Differential Methylation Analysis Quality for Microarray and NGS Platforms
Source: MDPI journal article supplement (doi:10.3390/ijms24108591), 2023-05-11
Supplement: s1 [file s1]

## Supplementary

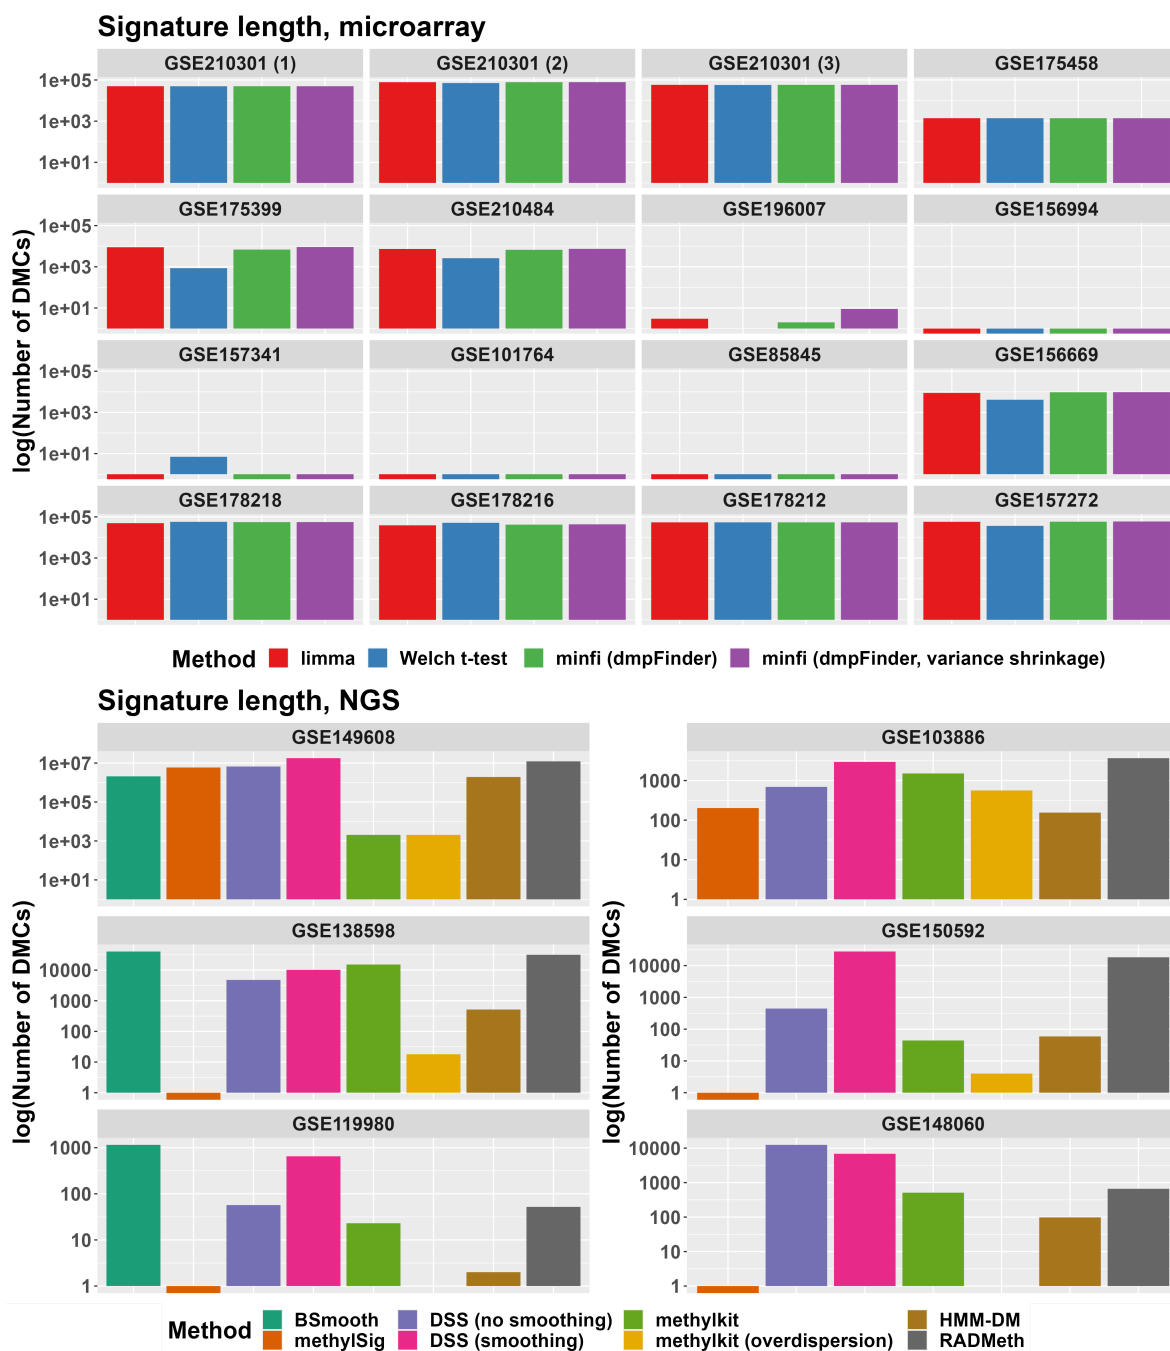

Supplementary Figure S1: The number of DMPs or DMCs for each evaluated method and dataset (log scale).

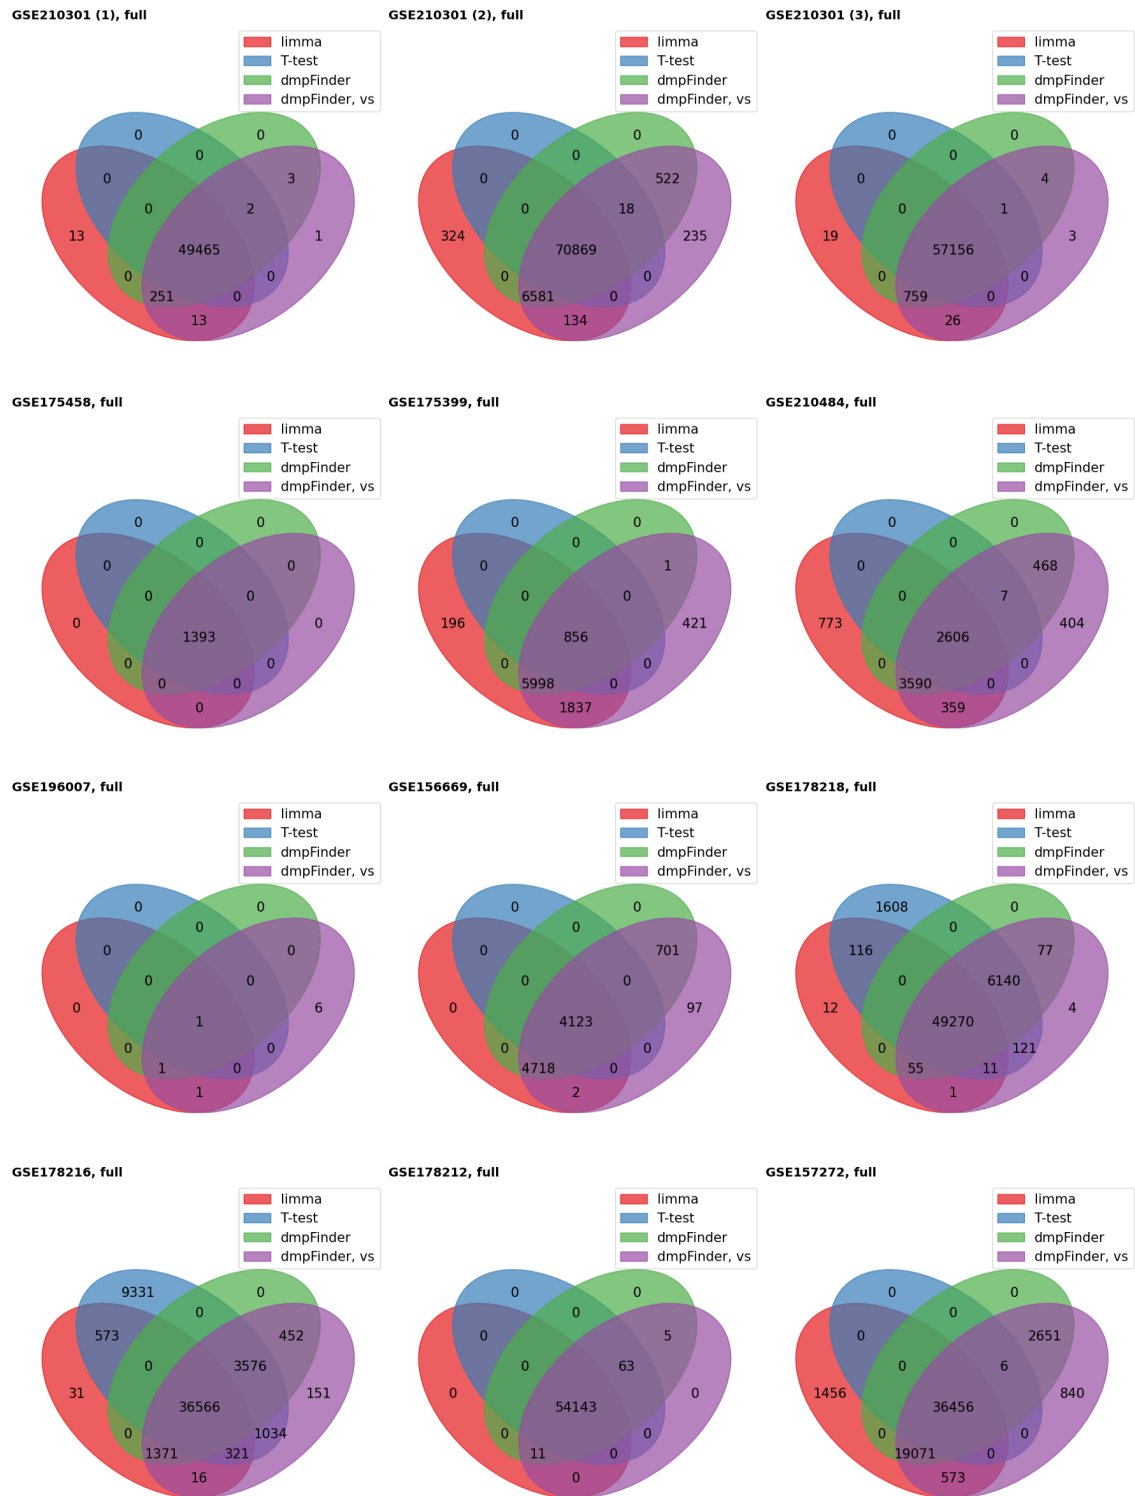

Supplementary Figure S2: Venn diagrams for the full signatures of microarray DM methods.

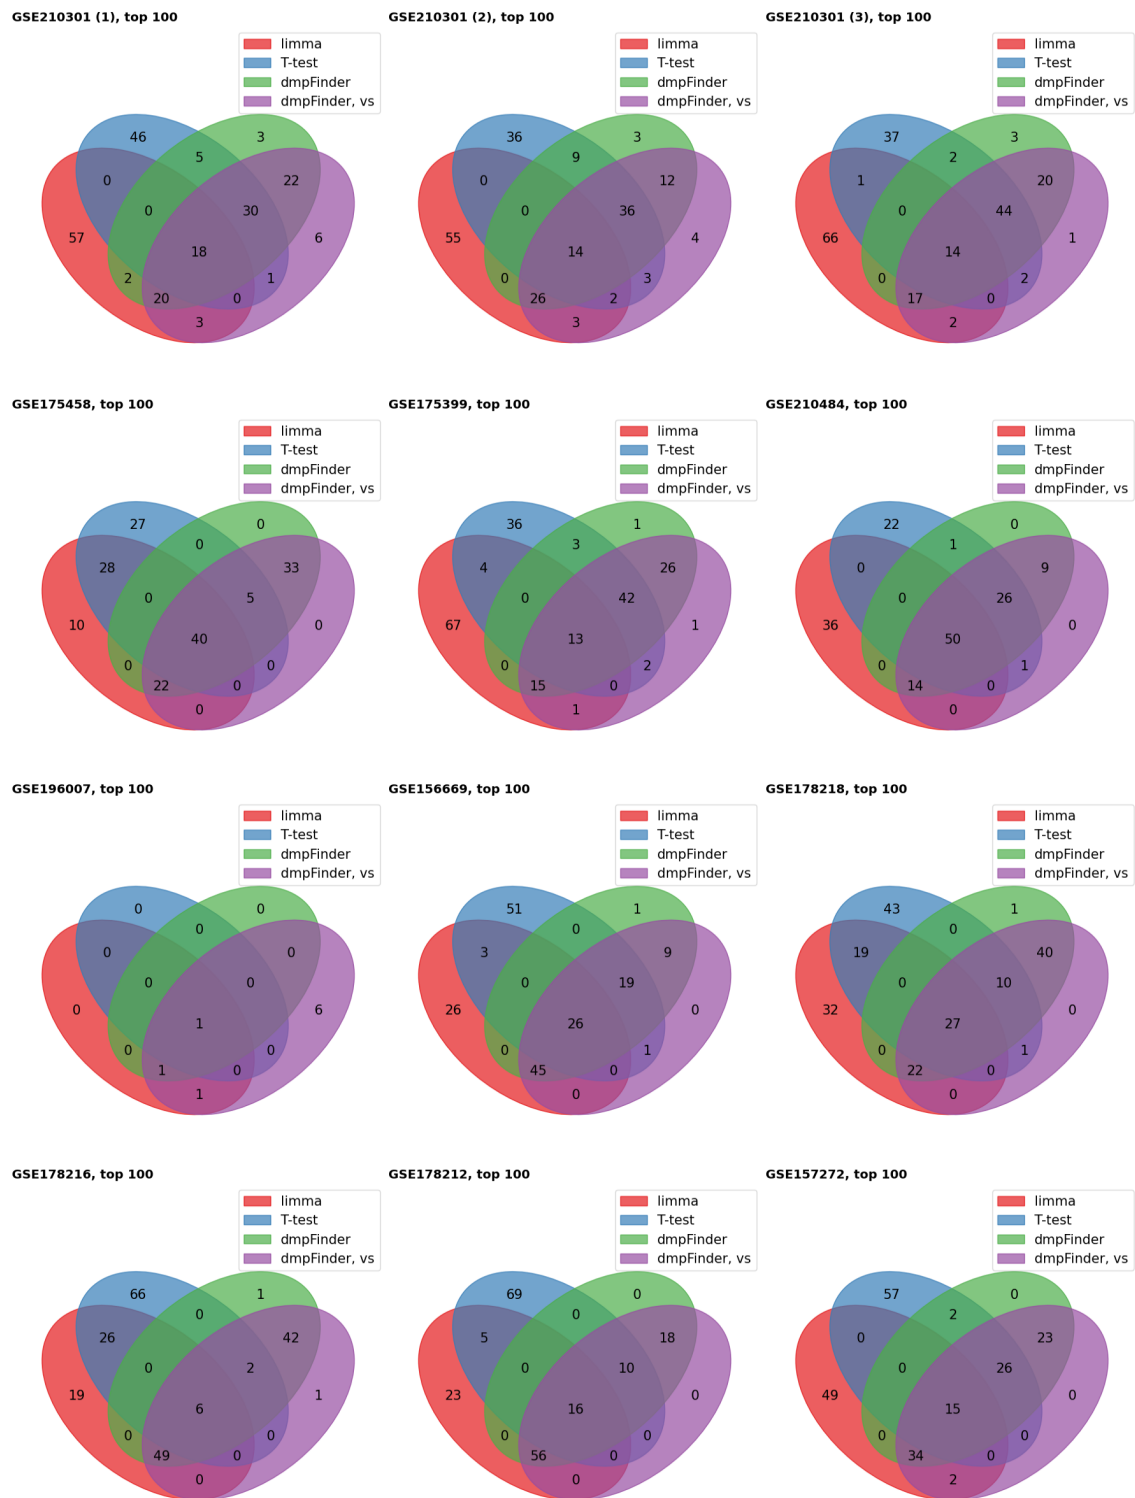

Supplementary Figure S3: Venn diagrams for the top 100 DMP signatures of microarray DM methods.



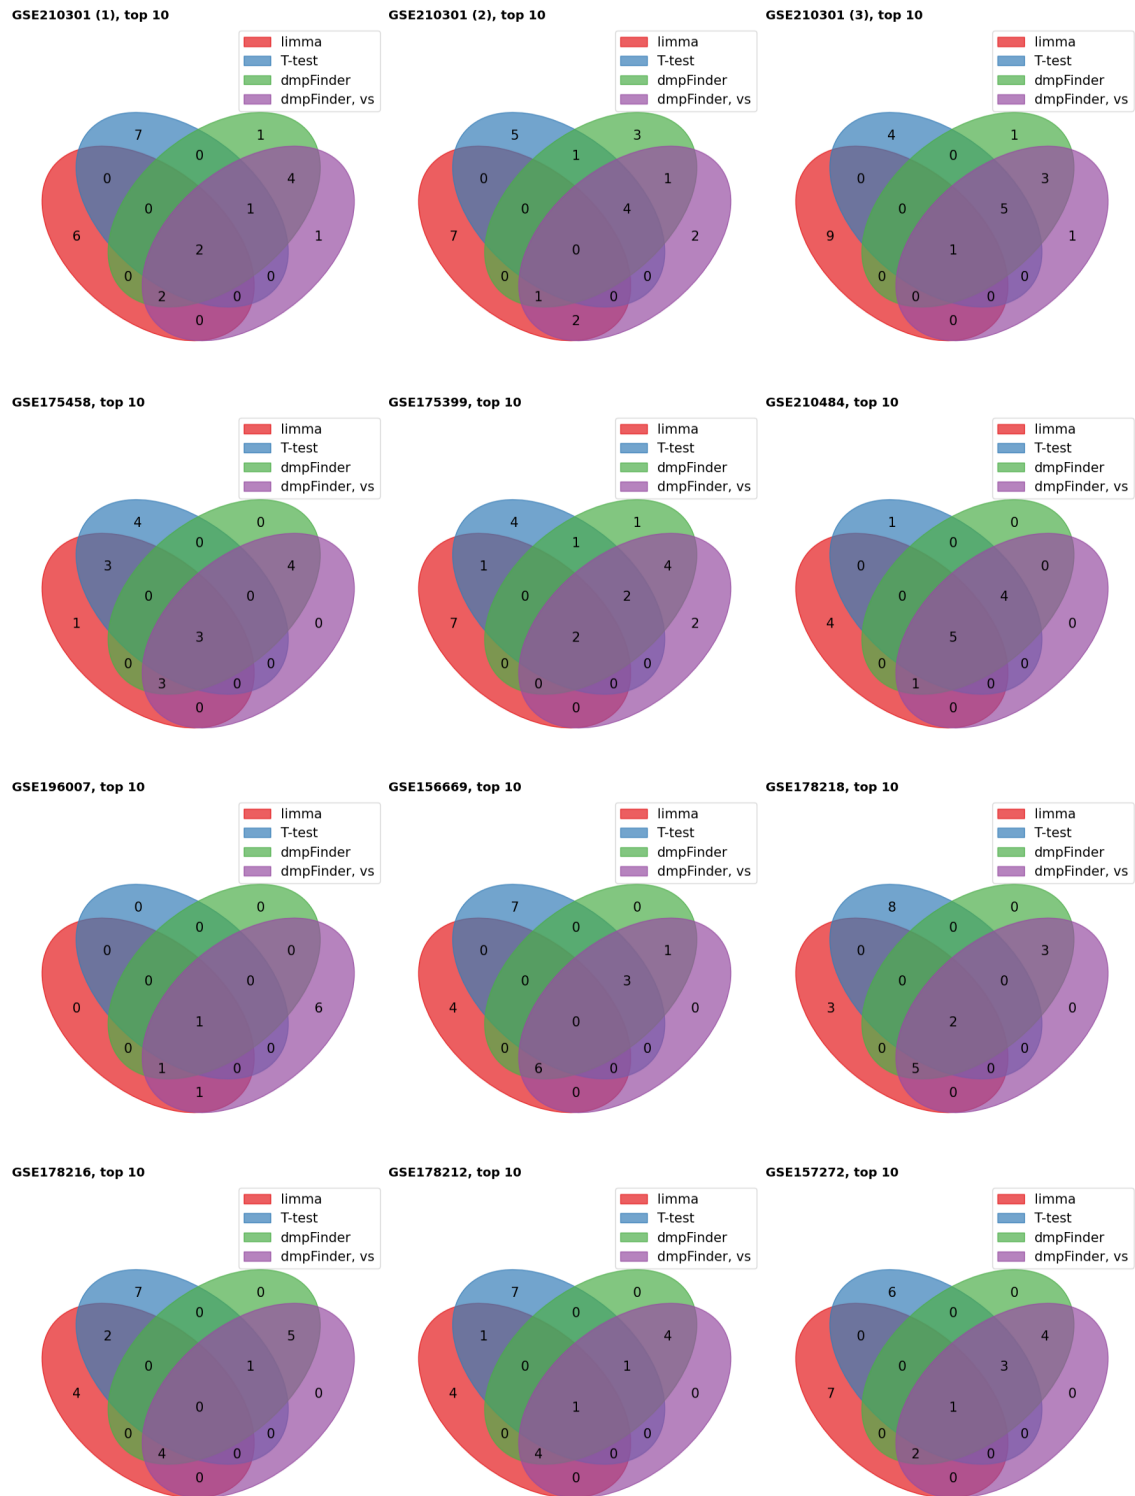

Supplementary Figure S4: Venn diagrams for the top 10 DMP signatures of microarray DM methods.

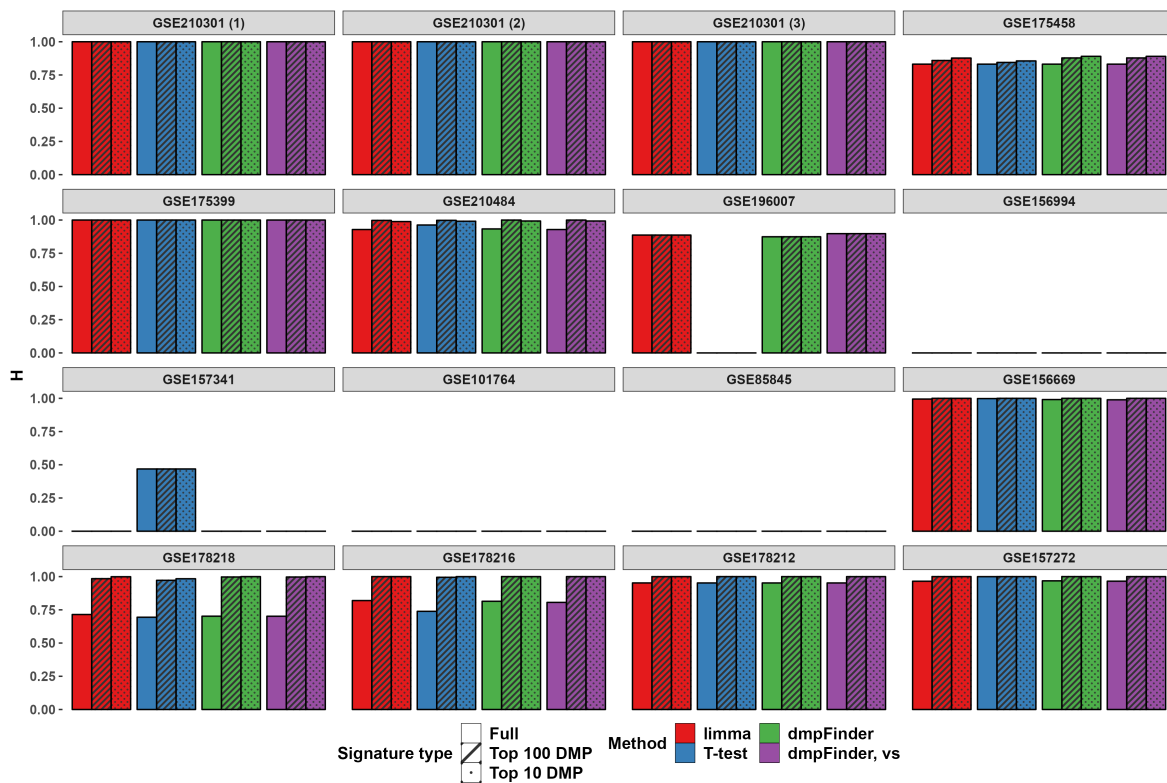

Supplementary Figure S5: Hobotnica metric values for each microarray dataset.

Supplementary Table S1: H-scores, lengths, and P-values of the full microarray signatures

| Dataset       | Method                         | Length | H-score | P-value |
|---------------|--------------------------------|--------|---------|---------|
| GSE210301 (1) | limma                          | 49742  | 1       | 1       |
|               | T-test                         | 49467  | 1       | 1       |
|               | dmpFinder                      | 49721  | 1       | 1       |
|               | dmpFinder (variance shrinkage) | 49735  | 1       | 1       |
| GSE210301 (2) | limma                          | 77908  | 1       | 2e-04   |
|               | T-test                         | 70887  | 1       | 2e-04   |
|               | dmpFinder                      | 77990  | 1       | 2e-04   |
|               | dmpFinder (variance shrinkage) | 78359  | 1       | 2e-04   |
| GSE210301 (3) | limma                          | 57960  | 1       | 1       |
|               | T-test                         | 57157  | 1       | 1       |
|               | dmpFinder                      | 57920  | 1       | 1       |
|               | dmpFinder (variance shrinkage) | 57949  | 1       | 1       |
| GSE175458     | limma                          | 1393   | 0.8314  | 2e-04   |
|               | T-test                         | 1393   | 0.8314  | 2e-04   |
|               | dmpFinder                      | 1393   | 0.8314  | 2e-04   |
|               | dmpFinder (variance shrinkage) | 1393   | 0.8314  | 2e-04   |
| GSE156994     | limma                          | 0      | 0       | NA      |
|               | T-test                         | 0      | 0       | NA      |
|               | dmpFinder                      | 0      | 0       | NA      |
|               | dmpFinder (variance shrinkage) | 0      | 0       | NA      |
| GSE157341     | limma                          | 0      | 0       | NA      |
|               | T-test                         | 7      | 0.4684  | 0.953   |
|               | dmpFinder                      | 0      | 0       | NA      |
|               | dmpFinder (variance shrinkage) | 0      | 0       | NA      |
| GSE85845      | limma                          | 0      | 0       | NA      |
|               | T-test                         | 0      | 0       | NA      |
|               | dmpFinder                      | 0      | 0       | NA      |
|               | dmpFinder (variance shrinkage) | 0      | 0       | NA      |
| GSE175399     | limma                          | 8887   | 1       | 0.0292  |
|               | T-test                         | 856    | 1       | 0.0322  |
|               | dmpFinder                      | 6855   | 1       | 0.0316  |
|               | dmpFinder (variance shrinkage) | 9113   | 1       | 0.0262  |
| GSE210484     | limma                          | 7328   | 0.9286  | 2e-04   |
|               | T-test                         | 2613   | 0.9626  | 2e-04   |
|               | dmpFinder                      | 6671   | 0.9331  | 2e-04   |
|               | dmpFinder (variance shrinkage) | 7434   | 0.9286  | 2e-04   |
| GSE196007     | limma                          | 3      | 0.8869  | 2e-04   |
|               | T-test                         | 1      | 0       | NA      |
|               | dmpFinder                      | 2      | 0.8742  | 2e-04   |
|               | dmpFinder (variance shrinkage) | 9      | 0.8976  | 2e-04   |
| GSE156669     | limma                          | 8843   | 0.9945  | 0.001   |
|               | T-test                         | 4123   | 0.9982  | 0.0012  |
|               | dmpFinder                      | 9542   | 0.9908  | 0.0014  |
|               | dmpFinder (variance shrinkage) | 9641   | 0.9889  | 0.0014  |
| GSE178218     | limma                          | 49465  | 0.7148  | 0.0226  |
|               | T-test                         | 57266  | 0.6944  | 0.0374  |
|               | dmpFinder                      | 55542  | 0.7022  | 0.0344  |
|               | dmpFinder (variance shrinkage) | 55679  | 0.7018  | 0.0328  |
| GSE178216     | limma                          | 38878  | 0.8197  | 0.0084  |
|               | T-test                         | 51401  | 0.7387  | 0.0442  |
|               | dmpFinder                      | 41965  | 0.8144  | 0.0106  |
|               | dmpFinder (variance shrinkage) | 43487  | 0.806   | 0.0106  |
| GSE178212     | limma                          | 54154  | 0.9524  | 0.0042  |
|               | T-test                         | 54206  | 0.9522  | 0.003   |
|               | dmpFinder                      | 54222  | 0.9522  | 0.0036  |
|               | dmpFinder (variance shrinkage) | 54222  | 0.9522  | 0.0038  |
| GSE157272     | limma                          | 57556  | 0.9652  | 0.0318  |
|               | T-test                         | 36462  | 0.9997  | 0.0034  |
|               | dmpFinder                      | 58184  | 0.9682  | 0.0264  |
|               | dmpFinder (variance shrinkage) | 59597  | 0.9656  | 0.0348  |

Supplementary Table S2: H-scores, lengths, and P-values of the top 100 DMP microarray signatures.

| Dataset       | Method                         | Length | H-score | P-value |
|---------------|--------------------------------|--------|---------|---------|
| GSE210301 (1) | limma                          | 100    | 1       | 1       |
|               | T-test                         | 100    | 1       | 1       |
|               | dmpFinder                      | 100    | 1       | 1       |
|               | dmpFinder (variance shrinkage) | 100    | 1       | 1       |
| GSE210301 (2) | limma                          | 100    | 1       | 2e-04   |
|               | T-test                         | 100    | 1       | 2e-04   |
|               | dmpFinder                      | 100    | 1       | 2e-04   |
|               | dmpFinder (variance shrinkage) | 100    | 1       | 2e-04   |
| GSE210301 (3) | limma                          | 100    | 1       | 1       |
|               | T-test                         | 100    | 1       | 1       |
|               | dmpFinder                      | 100    | 1       | 1       |
|               | dmpFinder (variance shrinkage) | 100    | 1       | 1       |
| GSE175458     | limma                          | 100    | 0.8589  | 2e-04   |
|               | T-test                         | 100    | 0.8444  | 2e-04   |
|               | dmpFinder                      | 100    | 0.8781  | 2e-04   |
|               | dmpFinder (variance shrinkage) | 100    | 0.8781  | NA      |
| GSE156994     | limma                          | 0      | 0       | NA      |
|               | T-test                         | 0      | 0       | NA      |
|               | dmpFinder                      | 0      | 0       | NA      |
|               | dmpFinder (variance shrinkage) | 0      | 0       | NA      |
| GSE157341     | limma                          | 0      | 0       | NA      |
|               | T-test                         | 7      | 0.4684  | 0.953   |
|               | dmpFinder                      | 0      | 0       | NA      |
|               | dmpFinder (variance shrinkage) | 0      | 0       | NA      |
| GSE85845      | limma                          | 0      | 0       | NA      |
|               | T-test                         | 0      | 0       | NA      |
|               | dmpFinder                      | 0      | 0       | NA      |
|               | dmpFinder (variance shrinkage) | 0      | 0       | NA      |
| GSE175399     | limma                          | 100    | 1       | 0.0308  |
|               | T-test                         | 100    | 1       | 0.0316  |
|               | dmpFinder                      | 100    | 1       | 0.0292  |
|               | dmpFinder (variance shrinkage) | 100    | 1       | 0.0344  |
| GSE210484     | limma                          | 100    | 0.9973  | 2e-04   |
|               | T-test                         | 100    | 0.9978  | 2e-04   |
|               | dmpFinder                      | 100    | 0.9998  | 2e-04   |
|               | dmpFinder (variance shrinkage) | 100    | 0.9998  | 2e-04   |
| GSE196007     | limma                          | 3      | 0.8869  | 2e-04   |
|               | T-test                         | 1      | 0       | NA      |
|               | dmpFinder                      | 2      | 0.8742  | 2e-04   |
|               | dmpFinder (variance shrinkage) | 9      | 0.8976  | 2e-04   |
| GSE156669     | limma                          | 100    | 1       | 0.0012  |
|               | T-test                         | 100    | 1       | 8e-04   |
|               | dmpFinder                      | 100    | 1       | 2e-04   |
|               | dmpFinder (variance shrinkage) | 100    | 1       | 2e-04   |
| GSE178218     | limma                          | 100    | 0.9846  | 2e-04   |
|               | T-test                         | 100    | 0.9722  | 2e-04   |
|               | dmpFinder                      | 100    | 0.9972  | 2e-04   |
|               | dmpFinder (variance shrinkage) | 100    | 0.997   | 2e-04   |
| GSE178216     | limma                          | 100    | 0.9999  | 2e-04   |
|               | T-test                         | 100    | 0.9949  | 2e-04   |
|               | dmpFinder                      | 100    | 1       | 2e-04   |
|               | dmpFinder (variance shrinkage) | 100    | 1       | 2e-04   |
| GSE178212     | limma                          | 100    | 0.9996  | 2e-04   |
|               | T-test                         | 100    | 1       | 2e-04   |
|               | dmpFinder                      | 100    | 0.9997  | 2e-04   |
|               | dmpFinder (variance shrinkage) | 100    | 0.9997  | 2e-04   |
| GSE157272     | limma                          | 100    | 1       | 0.0018  |
|               | T-test                         | 100    | 1       | 0.003   |
|               | dmpFinder                      | 100    | 1       | 0.0022  |
|               | dmpFinder (variance shrinkage) | 100    | 1       | 0.0018  |

Supplementary Table S3: H-scores, lengths, and P-values of the top 10 DMP microarray signatures.

| Dataset       | Method                         | Length | H-score | P-value |
|---------------|--------------------------------|--------|---------|---------|
| GSE210301 (1) | limma                          | 10     | 1       | 1       |
|               | T-test                         | 10     | 1       | 1       |
|               | dmpFinder                      | 10     | 1       | 1       |
|               | dmpFinder (variance shrinkage) | 10     | 1       | 1       |
| GSE210301 (2) | limma                          | 10     | 1       | 2e-04   |
|               | T-test                         | 10     | 1       | 2e-04   |
|               | dmpFinder                      | 10     | 1       | 2e-04   |
|               | dmpFinder (variance shrinkage) | 10     | 1       | 2e-04   |
| GSE210301 (3) | limma                          | 10     | 1       | 1       |
|               | T-test                         | 10     | 1       | 1       |
|               | dmpFinder                      | 10     | 1       | 1       |
|               | dmpFinder (variance shrinkage) | 10     | 1       | 1       |
| GSE175458     | limma                          | 10     | 0.8773  | 2e-04   |
|               | T-test                         | 10     | 0.8557  | 2e-04   |
|               | dmpFinder                      | 10     | 0.8903  | 2e-04   |
|               | dmpFinder (variance shrinkage) | 10     | 0.8903  | NA      |
| GSE156994     | limma                          | 0      | 0       | NA      |
|               | T-test                         | 0      | 0       | NA      |
|               | dmpFinder                      | 0      | 0       | NA      |
|               | dmpFinder (variance shrinkage) | 0      | 0       | NA      |
| GSE157341     | limma                          | 0      | 0       | NA      |
|               | T-test                         | 7      | 0.4684  | 0.953   |
|               | dmpFinder                      | 0      | 0       | NA      |
|               | dmpFinder (variance shrinkage) | 0      | 0       | NA      |
| GSE85845      | limma                          | 0      | 0       | NA      |
|               | T-test                         | 0      | 0       | NA      |
|               | dmpFinder                      | 0      | 0       | NA      |
|               | dmpFinder (variance shrinkage) | 0      | 0       | NA      |
| GSE175399     | limma                          | 10     | 1       | 0.0314  |
|               | T-test                         | 10     | 1       | 0.034   |
|               | dmpFinder                      | 10     | 1       | 0.0308  |
|               | dmpFinder (variance shrinkage) | 10     | 1       | 0.0296  |
| GSE210484     | limma                          | 10     | 0.9885  | 2e-04   |
|               | T-test                         | 10     | 0.991   | 2e-04   |
|               | dmpFinder                      | 10     | 0.9927  | 2e-04   |
|               | dmpFinder (variance shrinkage) | 10     | 0.9927  | 2e-04   |
| GSE196007     | limma                          | 3      | 0.8869  | 2e-04   |
|               | T-test                         | 1      | 0       | NA      |
|               | dmpFinder                      | 2      | 0.8742  | 2e-04   |
|               | dmpFinder (variance shrinkage) | 9      | 0.8976  | 2e-04   |
| GSE156669     | limma                          | 10     | 1       | 2e-04   |
|               | T-test                         | 10     | 1       | 6e-04   |
|               | dmpFinder                      | 10     | 1       | 4e-04   |
|               | dmpFinder (variance shrinkage) | 10     | 1       | 4e-04   |
| GSE178218     | limma                          | 10     | 0.9991  | 2e-04   |
|               | T-test                         | 10     | 0.9839  | 2e-04   |
|               | dmpFinder                      | 10     | 0.9999  | 2e-04   |
|               | dmpFinder (variance shrinkage) | 10     | 0.9999  | 2e-04   |
| GSE178216     | limma                          | 10     | 1       | 2e-04   |
|               | T-test                         | 10     | 0.9998  | 2e-04   |
|               | dmpFinder                      | 10     | 1       | 2e-04   |
|               | dmpFinder (variance shrinkage) | 10     | 1       | 2e-04   |
| GSE178212     | limma                          | 10     | 0.9999  | 2e-04   |
|               | T-test                         | 10     | 1       | 2e-04   |
|               | dmpFinder                      | 10     | 1       | 2e-04   |
|               | dmpFinder (variance shrinkage) | 10     | 1       | 2e-04   |
| GSE157272     | limma                          | 10     | 1       | 0.0022  |
|               | T-test                         | 10     | 1       | 0.003   |
|               | dmpFinder                      | 10     | 1       | 0.0038  |
|               | dmpFinder (variance shrinkage) | 10     | 1       | 0.0018  |

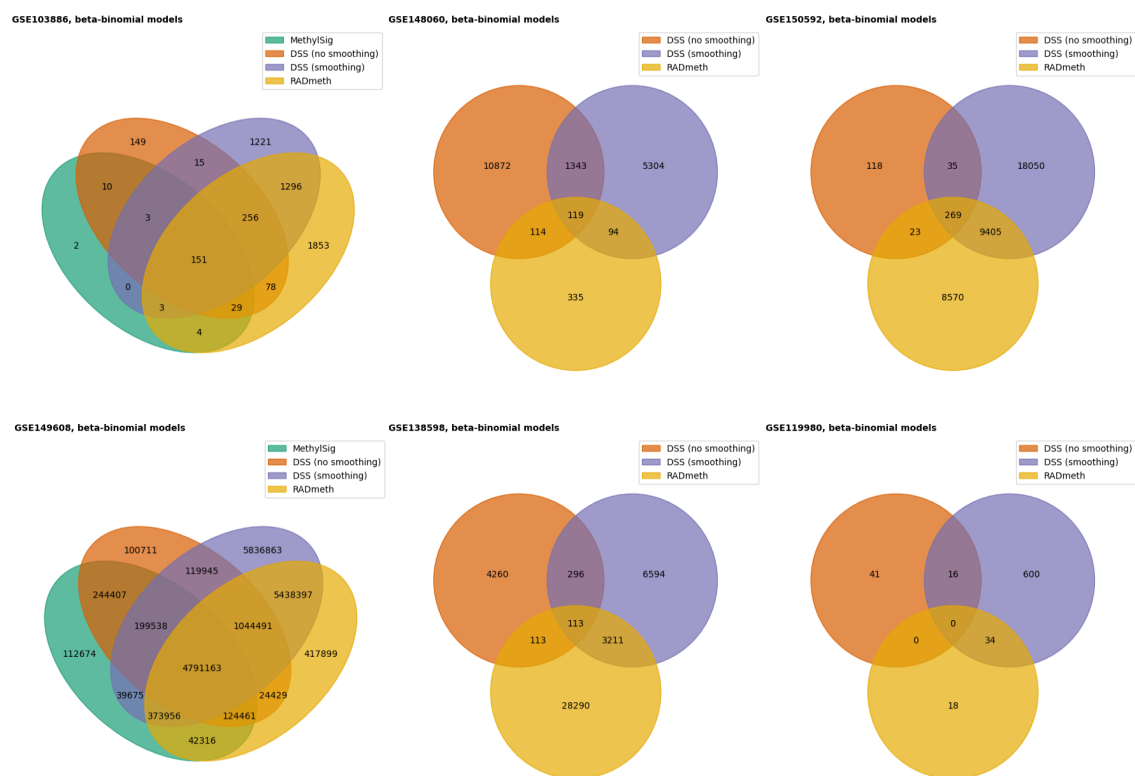

Supplementary Figure S6: Venn diagrams for NGS beta-binomial DM methods (the full signatures).

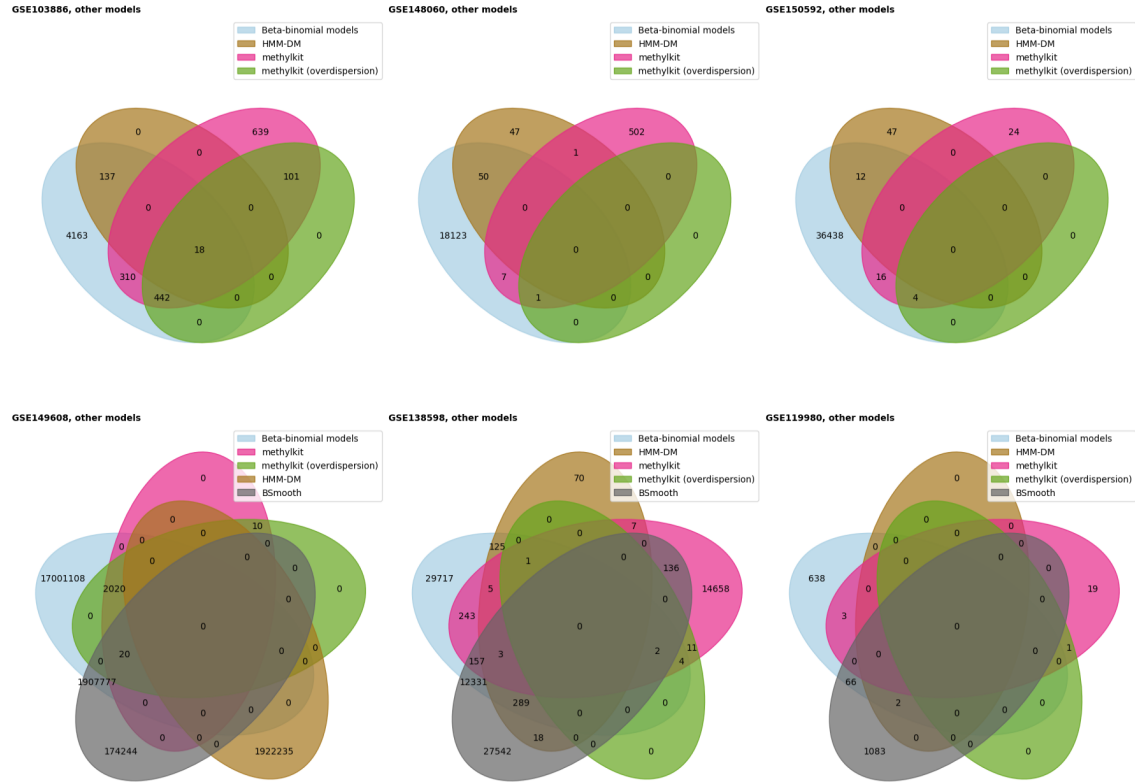

Supplementary Figure S7: Venn diagrams for the union of beta-binomial methods DMCs (blue) and other evaluated NGS methods (the full signatures). The intersection of all methods is empty for all datasets except GSE103886 and 12 DMCs for GSE103886.

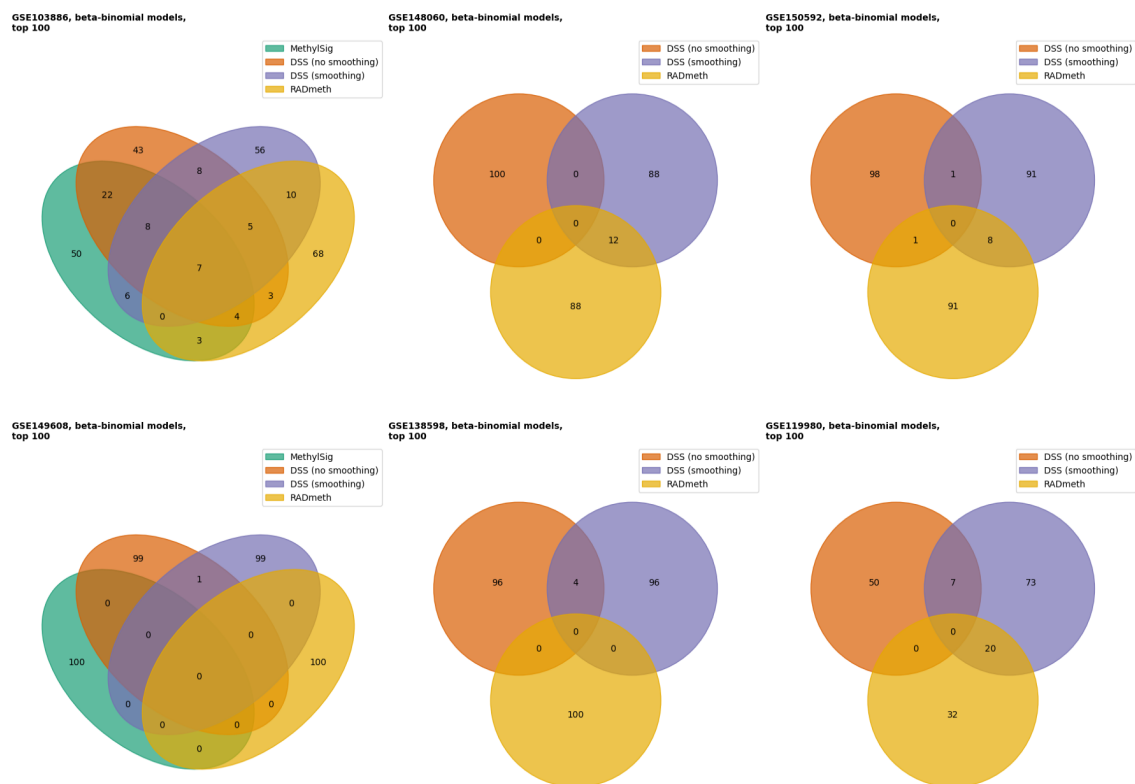

Supplementary Figure S8: Venn diagrams for NGS beta-binomial DM methods (the top 100 DMC signatures).





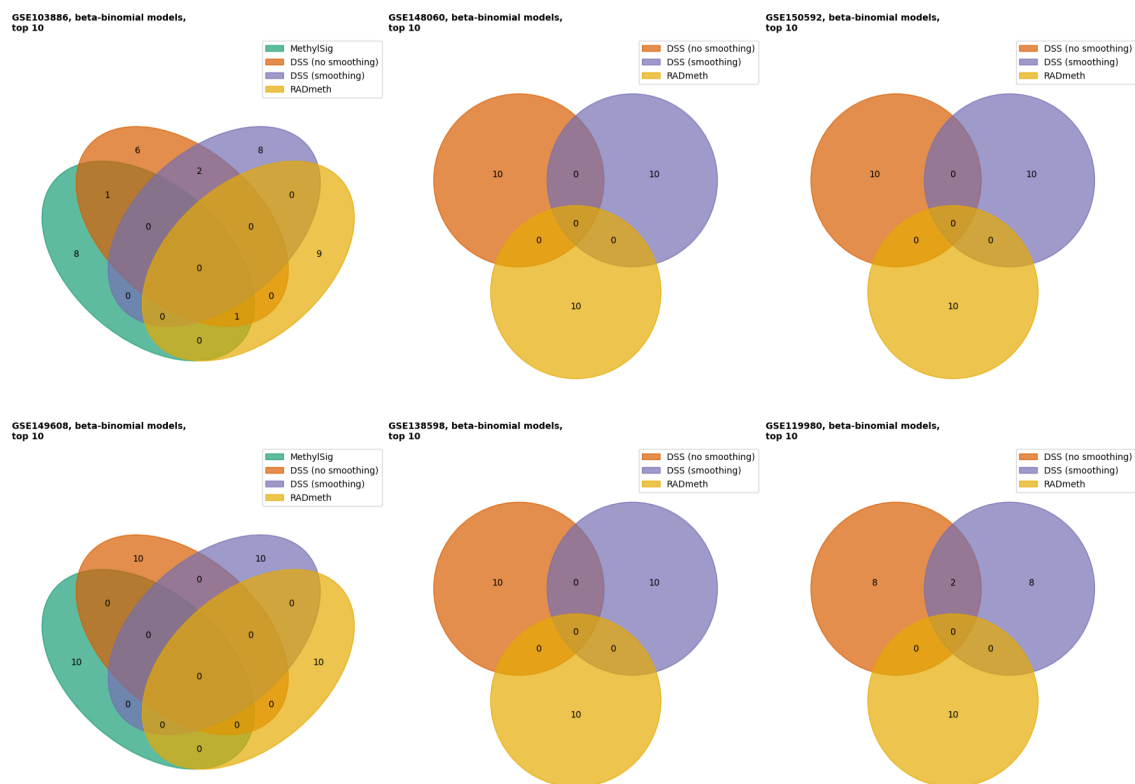

Supplementary Figure S10: Venn diagrams for NGS beta-binomial DM methods (the top 10 DMC signatures).

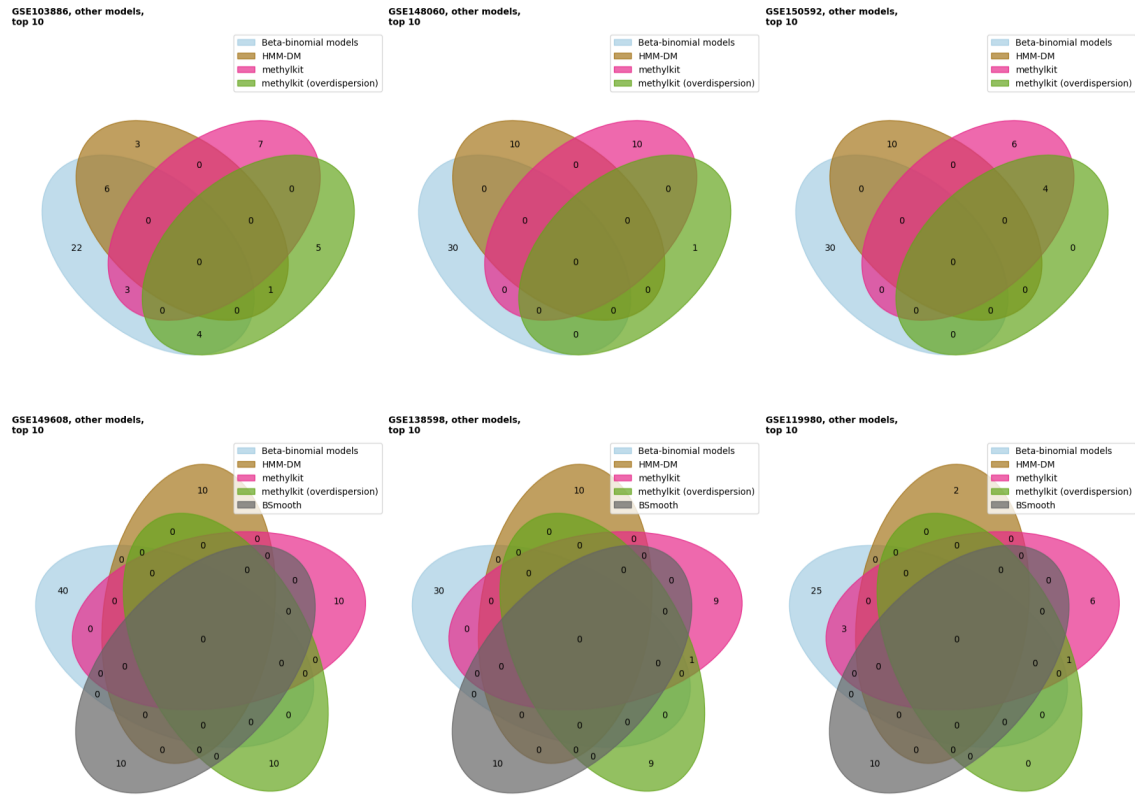

Supplementary Figure S11: Venn diagrams for the union of beta-binomial methods DMCs (blue) and other evaluated NGS methods (the top 10 DMC signatures).

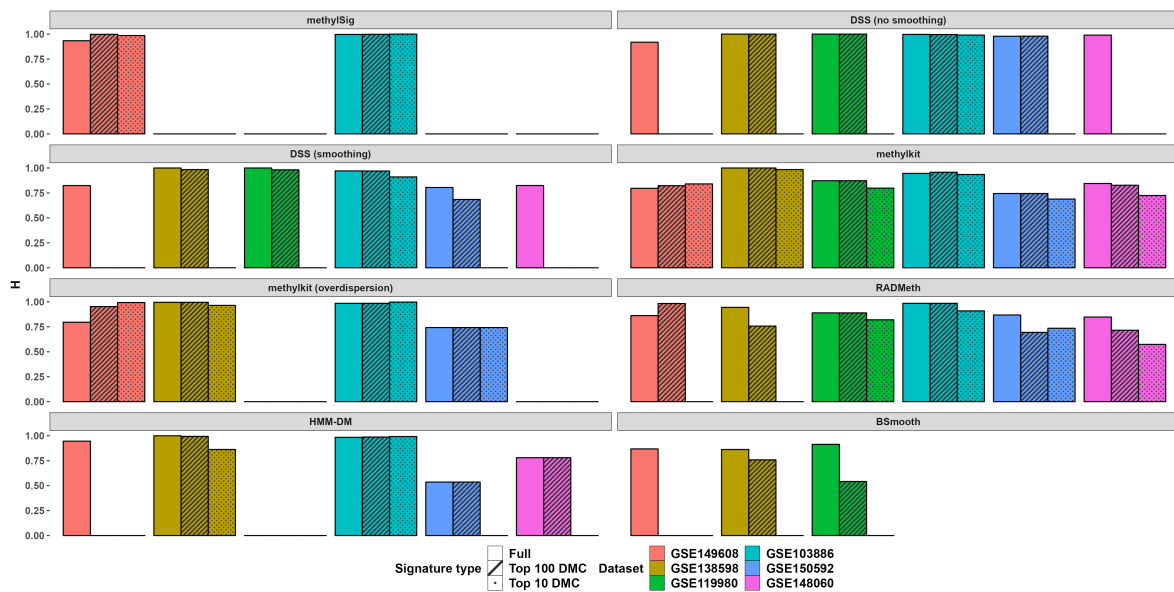

Supplementary Figure S12: Hobotnica metric values for each NGS method.

Supplementary Table S4: H-scores, lengths, and P-values for the full NGS signatures.

| Dataset   | Method                     | Length   | H-score | P-value |
|-----------|----------------------------|----------|---------|---------|
| GSE150592 | methylSig                  | 0        | 0       | 0       |
|           | DSS (no smoothing)         | 445      | 0.9785  | 0.0002  |
|           | DSS (smoothing)            | 27759    | 0.8049  | 0.0002  |
|           | methylkit                  | 44       | 0.7443  | 0.0002  |
|           | methylkit (overdispersion) | 4        | 0.7426  | 0.7426  |
|           | RADMeth                    | 18267    | 0.8685  | 0.0002  |
|           | HMM-DM                     | 59       | 0.5361  | 0.172   |
| GSE149608 | methylSig                  | 5928190  | 0.9334  | 0.0002  |
|           | DSS (no smoothing)         | 6649145  | 0.9189  | 0.0002  |
|           | DSS (smoothing)            | 17844028 | 0.8236  | 0.0002  |
|           | methylkit                  | 2050     | 0.7961  |         |
|           | methylkit (overdispersion) | 2050     | 0.7961  |         |
|           | RADMeth                    | 12257112 | 0.8626  | 0.0002  |
|           | HMM-DM                     | 1922235  | 0.946   | 0.0002  |
|           | BSmooth                    | 2082041  | 0.8683  | 0.0002  |
| GSE148060 | methylSig                  | 0        | 0       |         |
|           | DSS (no smoothing)         | 12448    | 0.9897  | 0.0002  |
|           | DSS (smoothing)            | 6860     | 0.8244  | 0.0002  |
|           | methylkit                  | 511      | 0.8449  | 0.0002  |
|           | methylkit (overdispersion) | 1        | 0       |         |
|           | RADMeth                    | 662      | 0.8483  | 0.0002  |
|           | HMM-DM                     | 98       | 0.7803  | 0.0002  |
| GSE138598 | methylSig                  | 0        | 0       | 0       |
|           | DSS (no smoothing)         | 4782     | 1       | 0.0002  |
|           | DSS (smoothing)            | 10214    | 1       | 0.0002  |
|           | methylkit                  | 15227    | 1       | 0.0002  |
|           | methylkit (overdispersion) | 18       | 0.9954  | 0.0002  |
|           | RADMeth                    | 31727    | 0.9449  | 0.0002  |
|           | HMM-DM                     | 518      | 1       | 0.0002  |
|           | BSmooth                    | 40478    | 0.8624  | 0.0002  |
| GSE119980 | methylSig                  | 0        | 0       |         |
|           | DSS (no smoothing)         | 57       | 1       |         |
|           | DSS (smoothing)            | 650      | 1       | 0.0002  |
|           | methylkit                  | 23       | 0.8722  |         |
|           | methylkit (overdispersion) | 1        | 0       |         |
|           | RADMeth                    | 52       | 0.8898  |         |
|           | HMM-DM                     | 2        | 0       |         |
|           | BSmooth                    | 1151     | 0.9139  | 0.0002  |
| GSE103886 | methylSig                  | 202      | 0.9965  | 0.0002  |
|           | DSS (no smoothing)         | 691      | 0.997   | 0.0002  |
|           | DSS (smoothing)            | 2945     | 0.9706  | 0.0002  |
|           | methylkit                  | 1510     | 0.9459  | 0.0002  |
|           | methylkit (overdispersion) | 561      | 0.9853  | 0.0002  |
|           | RADMeth                    | 3670     | 0.9855  | 0.0002  |
|           | HMM-DM                     | 155      | 0.9842  | 0.0002  |

Supplementary Table S5: H-scores, lengths, and P-values for the top 100 DMC NGS signatures.

| Dataset   | Method                     | Length | H-score | P-value |
|-----------|----------------------------|--------|---------|---------|
| GSE150592 | methylSig                  | 0      | 0       | 0       |
|           | DSS (no smoothing)         | 100    | 0.9794  | 0.0002  |
|           | DSS (smoothing)            | 100    | 0.6847  | 0.0002  |
|           | methylkit                  | 44     | 0.7443  | 0.0002  |
|           | methylkit (overdispersion) | 4      | 0.7426  | 0.7426  |
|           | RADMeth                    | 100    | 0.6944  | 0.0002  |
|           | HMM-DM                     | 59     | 0.5361  | 0.1714  |
| GSE149608 | methylSig                  | 100    | 0.9978  |         |
|           | DSS (no smoothing)         | 100    | 0       |         |
|           | DSS (smoothing)            | 100    | 0       |         |
|           | methylkit                  | 100    | 0.8229  |         |
|           | methylkit (overdispersion) | 100    | 0.9527  |         |
|           | RADMeth                    | 100    | 0.9837  |         |
|           | HMM-DM                     | 100    | 0       |         |
|           | BSmooth                    | 100    | 0       |         |
| GSE148060 | methylSig                  | 0      | 0       |         |
|           | DSS (no smoothing)         | 100    | 0       |         |
|           | DSS (smoothing)            | 100    | 0       |         |
|           | methylkit                  | 100    | 0.827   | 0.0002  |
|           | methylkit (overdispersion) | 1      | 0       |         |
|           | RADMeth                    | 100    | 0.7156  | 0.0002  |
|           | HMM-DM                     | 98     | 0.7803  | 0.0002  |
| GSE138598 | methylSig                  | 0      | 0       | 0       |
|           | DSS (no smoothing)         | 100    | 1       | 0.0002  |
|           | DSS (smoothing)            | 100    | 0.9837  | 0.0002  |
|           | methylkit                  | 100    | 1       | 0.0002  |
|           | methylkit (overdispersion) | 18     | 0.9954  | 0.0002  |
|           | RADMeth                    | 100    | 0.7572  | 0.0002  |
|           | HMM-DM                     | 100    | 0.9937  | 0.0002  |
|           | BSmooth                    | 100    | 0.7587  | 0.0002  |
| GSE119980 | methylSig                  | 0      | 0       |         |
|           | DSS (no smoothing)         | 57     | 1       |         |
|           | DSS (smoothing)            | 100    | 0.9815  | 0.0002  |
|           | methylkit                  | 23     | 0.8722  |         |
|           | methylkit (overdispersion) | 1      | 0       |         |
|           | RADMeth                    | 52     | 0.8898  |         |
|           | HMM-DM                     | 2      | 0       |         |
|           | BSmooth                    | 100    | 0.5417  | 0.2761  |
| GSE103886 | methylSig                  | 100    | 0.9979  | 0.0002  |
|           | DSS (no smoothing)         | 100    | 0.9956  | 0.0002  |
|           | DSS (smoothing)            | 100    | 0.9696  | 0.0002  |
|           | methylkit                  | 100    | 0.9571  | 0.0002  |
|           | methylkit (overdispersion) | 100    | 0.9859  | 0.0002  |
|           | RADMeth                    | 100    | 0.9856  | 0.0002  |
|           | HMM-DM                     | 100    | 0.9872  | 0.0002  |

Supplementary Table S6: H-scores, lengths, and P-values for the top 10 DMC NGS signatures.

| Dataset   | Method                     | Length | H-score | P-value |
|-----------|----------------------------|--------|---------|---------|
| GSE150592 | methylSig                  | 0      | 0       | 0       |
|           | DSS (no smoothing)         | 10     | 0       | 0.0002  |
|           | DSS (smoothing)            | 10     | 0       | 0.0002  |
|           | methylkit                  | 10     | 0.6885  | 0.0002  |
|           | methylkit (overdispersion) | 4      | 0.7426  | 0.7426  |
|           | RADMeth                    | 10     | 0.7356  | 0.0002  |
|           | HMM-DM                     | 10     | 0       | 0.1714  |
| GSE149608 | methylSig                  | 10     | 0.9857  |         |
|           | DSS (no smoothing)         | 10     | 0       |         |
|           | DSS (smoothing)            | 10     | 0       |         |
|           | methylkit                  | 10     | 0.8404  |         |
|           | methylkit (overdispersion) | 10     | 0.9933  |         |
|           | RADMeth                    | 10     | 0       |         |
|           | HMM-DM                     | 10     | 0       |         |
|           | BSmooth                    | 10     | 0       |         |
| GSE148060 | methylSig                  | 0      | 0       |         |
|           | DSS (no smoothing)         | 10     | 0       |         |
|           | DSS (smoothing)            | 10     | 0       |         |
|           | methylkit                  | 10     | 0.7243  |         |
|           | methylkit (overdispersion) | 1      | 0       |         |
|           | RADMeth                    | 10     | 0.5739  |         |
|           | HMM-DM                     | 10     | 0       |         |
| GSE138598 | methylSig                  | 0      | 0       |         |
|           | DSS (no smoothing)         | 10     | 0       |         |
|           | DSS (smoothing)            | 10     | 0       |         |
|           | methylkit                  | 10     | 0.9842  |         |
|           | methylkit (overdispersion) | 10     | 0.9648  |         |
|           | RADMeth                    | 10     | 0       |         |
|           | HMM-DM                     | 10     | 0.8626  |         |
|           | BSmooth                    | 10     | 0       |         |
| GSE119980 | methylSig                  | 0      | 0       |         |
|           | DSS (no smoothing)         | 10     | 0       |         |
|           | DSS (smoothing)            | 10     | 0       |         |
|           | methylkit                  | 10     | 0.7981  |         |
|           | methylkit (overdispersion) | 1      | 0       |         |
|           | RADMeth                    | 10     | 0.8204  |         |
|           | HMM-DM                     | 2      | 0       |         |
|           | BSmooth                    | 10     | 0       |         |
| GSE103886 | methylSig                  | 10     | 1       |         |
|           | DSS (no smoothing)         | 10     | 0.9903  |         |
|           | DSS (smoothing)            | 10     | 0.9105  |         |
|           | methylkit                  | 10     | 0.9349  |         |
|           | methylkit (overdispersion) | 10     | 0.9978  |         |
|           | RADMeth                    | 10     | 0.9098  | 0.0002  |
|           | HMM-DM                     | 10     | 0.9919  |         |

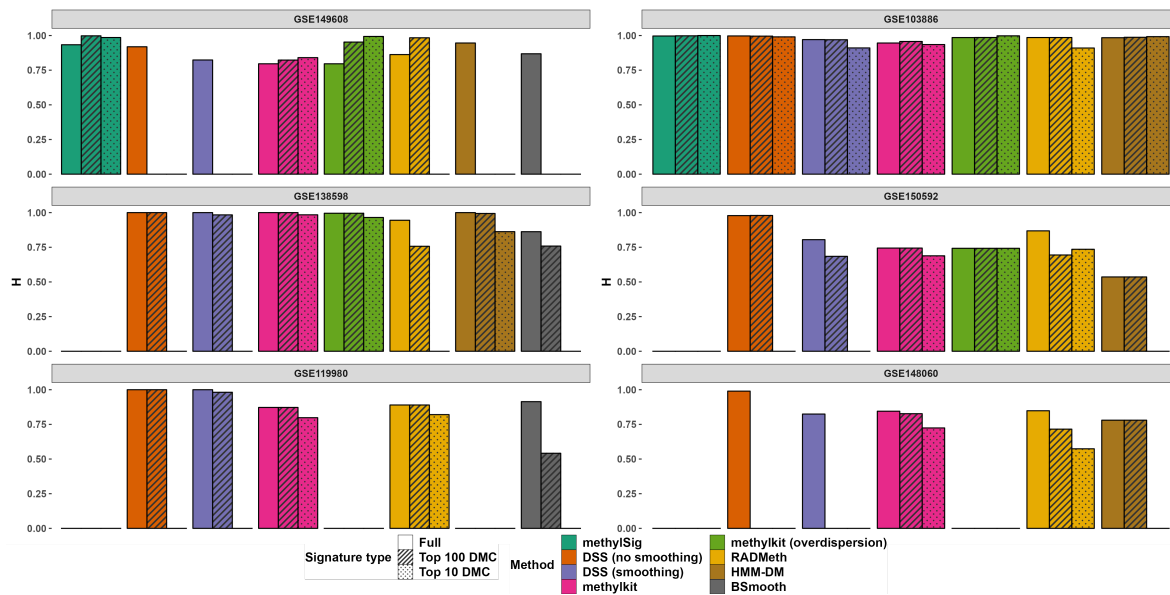

Supplementary Figure S13: Hobotnica metric values for each NGS dataset.

Supplementary Table S7: Results of Friedman test used to compare H-scores of signatures resulting from different methods.

| Data type                       | Signature   | Sample size | Shapiro-Wilk p-value | Friedman p-value |
|---------------------------------|-------------|-------------|----------------------|------------------|
| Microarray                      | full        | 16x4        | 2.186e-10            | 0.6325           |
| Microarray                      | top 100 DMP | 16x4        | 6.147e-12            | 0.1049           |
| Microarray                      | top 10 DMP  | 16x4        | 5.56e-12             | 0.1527           |
| WGBS                            | full        | 3x8         | 8.529e-07            | 0.4382           |
| WGBS                            | top 100 DMC | 3x8         | 1.789e-05            | 0.7149           |
| WGBS                            | top 10 DMC  | 3x8         | 1.508e-06            | 0.171            |
| RRBS                            | full        | 3x7         | 2.042e-05            | 0.09196          |
| RRBS                            | top 100 DMC | 3x7         | 0.0001883            | 0.8041           |
| RRBS                            | top 10 DMC  | 3x7         | 0.0001782            | 0.572            |
| WGBS and RRBS (without BSmooth) | full        | 6x7         | 1.227e-08            | 0.04019          |
| WGBS and RRBS (without BSmooth) | top 100 DMC | 6x7         | 1.462e-07            | 0.5936           |
| WGBS and RRBS (without BSmooth) | top 10 DMC  | 6x7         | 1.247e-07            | 0.05854          |

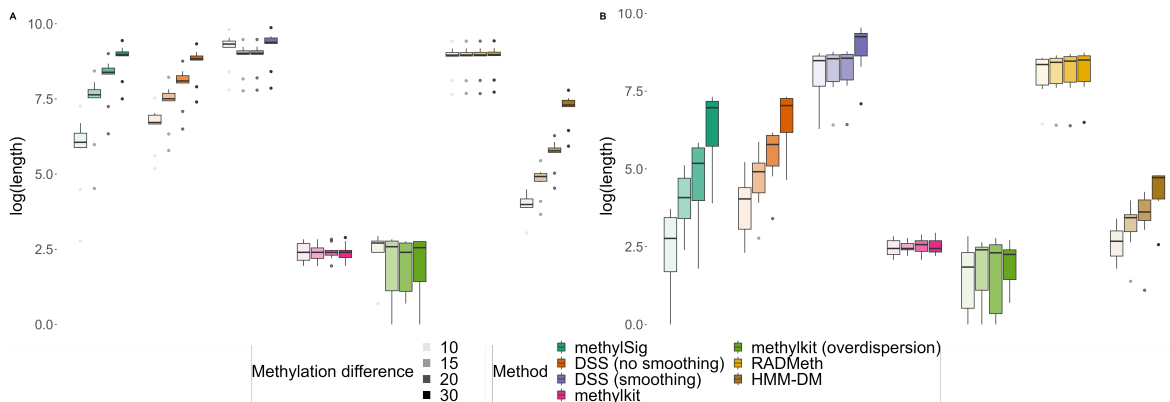

Supplementary Figure S14: Signature length for simulated data (A): The first group of datasets. (B): The second group of datasets.

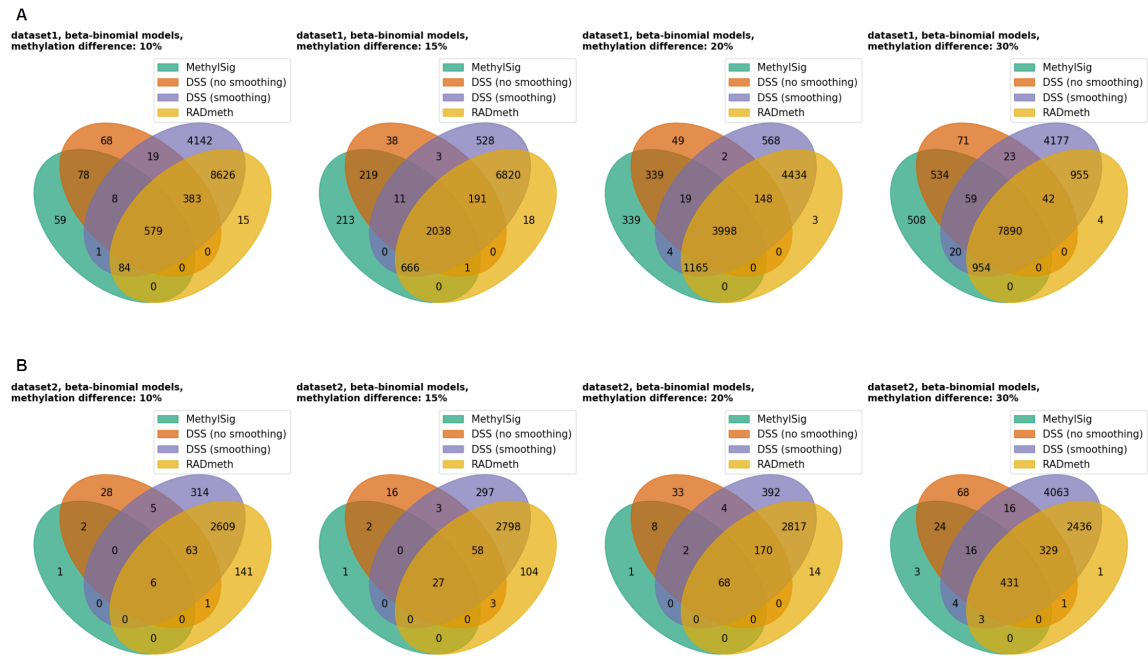

Supplementary Figure S15: Venn diagrams for beta-binomial DM methods (the full signatures, simulated data) **(A)**: The first group of datasets. **(B)**: The second group of datasets.

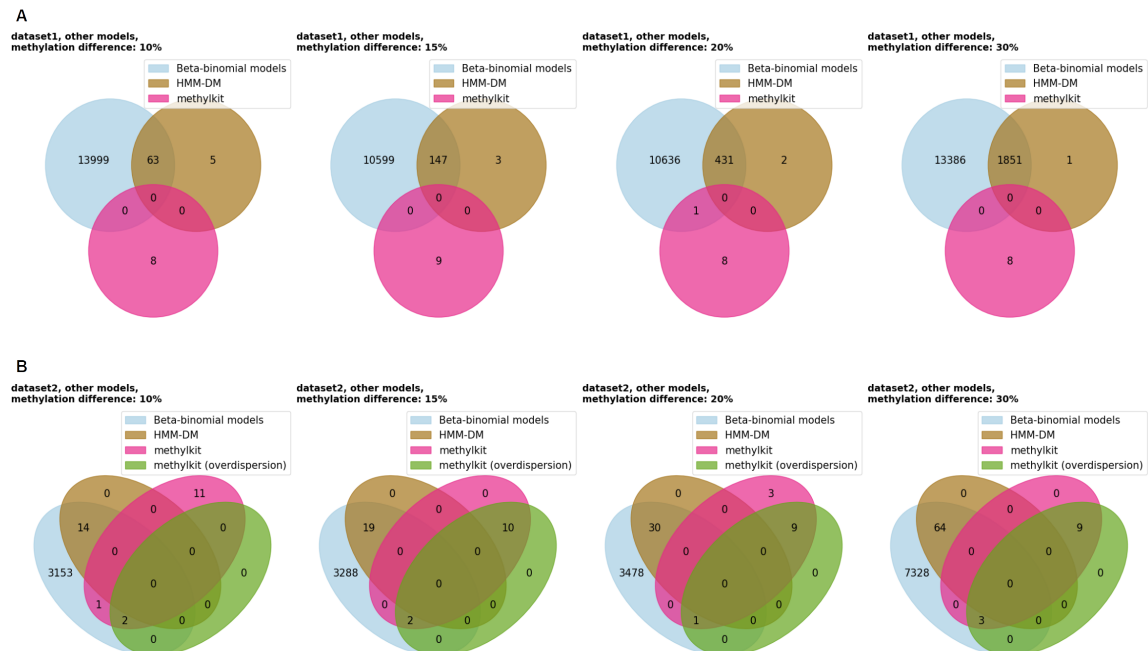

Supplementary Figure S16: Venn diagrams for the union of beta-binomial methods DMCs (blue) and other evaluated methods (the full signatures, simulated data) **(A)**: The first group of datasets. **(B)**: The second group of datasets.



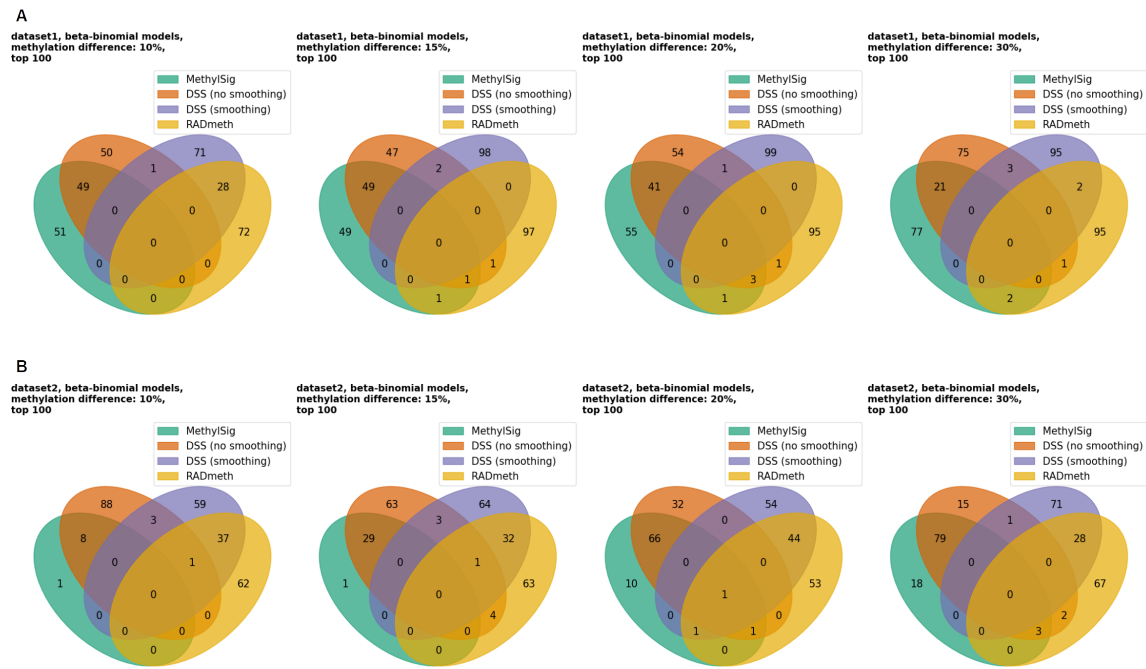

Supplementary Figure S17: Venn diagrams for beta-binomial DM methods (the top 100 DMC signatures, simulated data) (A): The first group of datasets. (B): The second group of datasets.

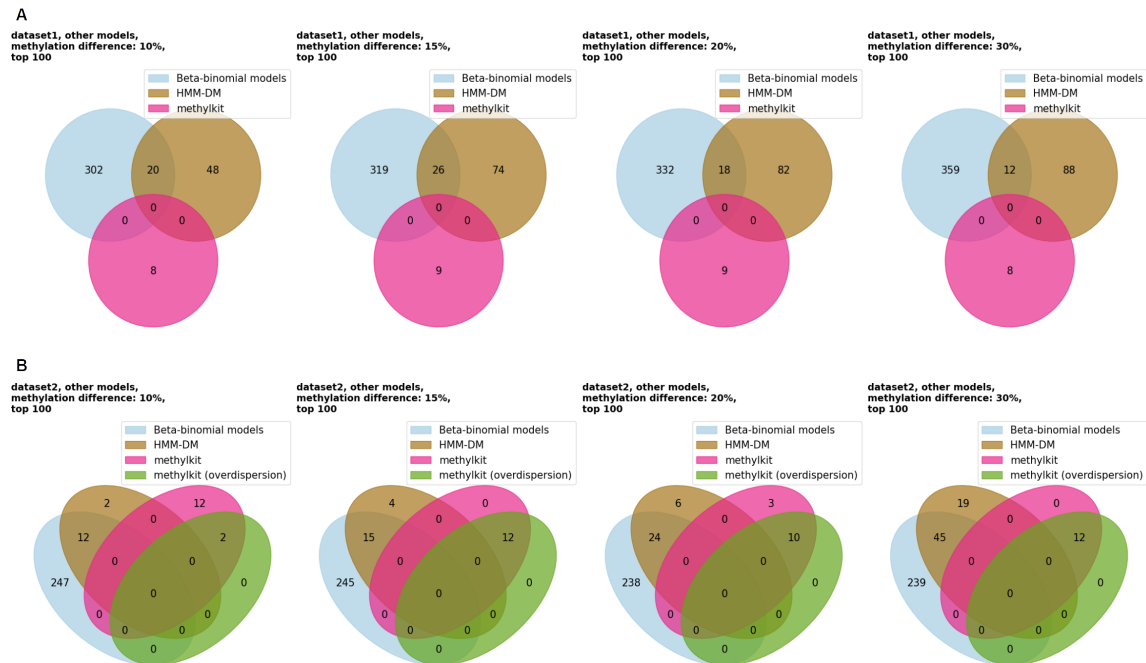

Supplementary Figure S18: Venn diagrams for the union of beta-binomial methods DMCs (blue) and other evaluated methods (the top 100 DMC signatures, simulated data) (A): The first group of datasets. (B): The second group of datasets.

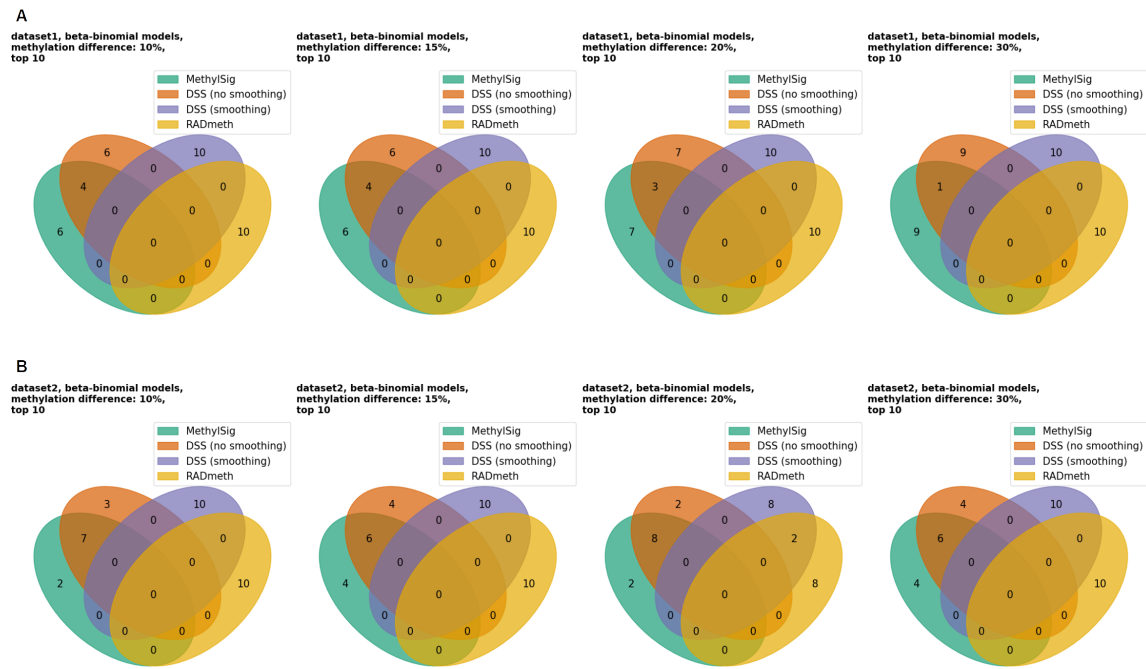

Supplementary Figure S19: Venn diagrams for beta-binomial DM methods (the top 10 DMC signatures, simulated data) **(A)**: The first group of datasets. **(B)**: The second group of datasets.

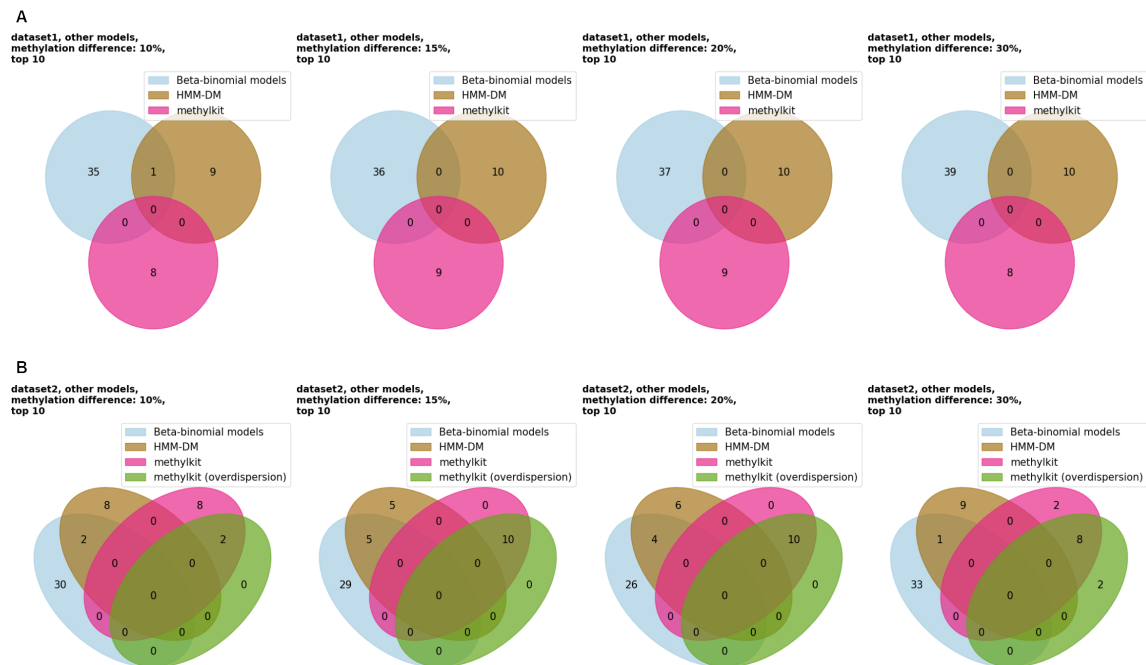

Supplementary Figure S20: Venn diagrams for the union of beta-binomial methods DMCs (blue) and other evaluated methods (the top 10 DMC signatures, simulated data) **(A)**: The first group of datasets. **(B)**: The second group of datasets.

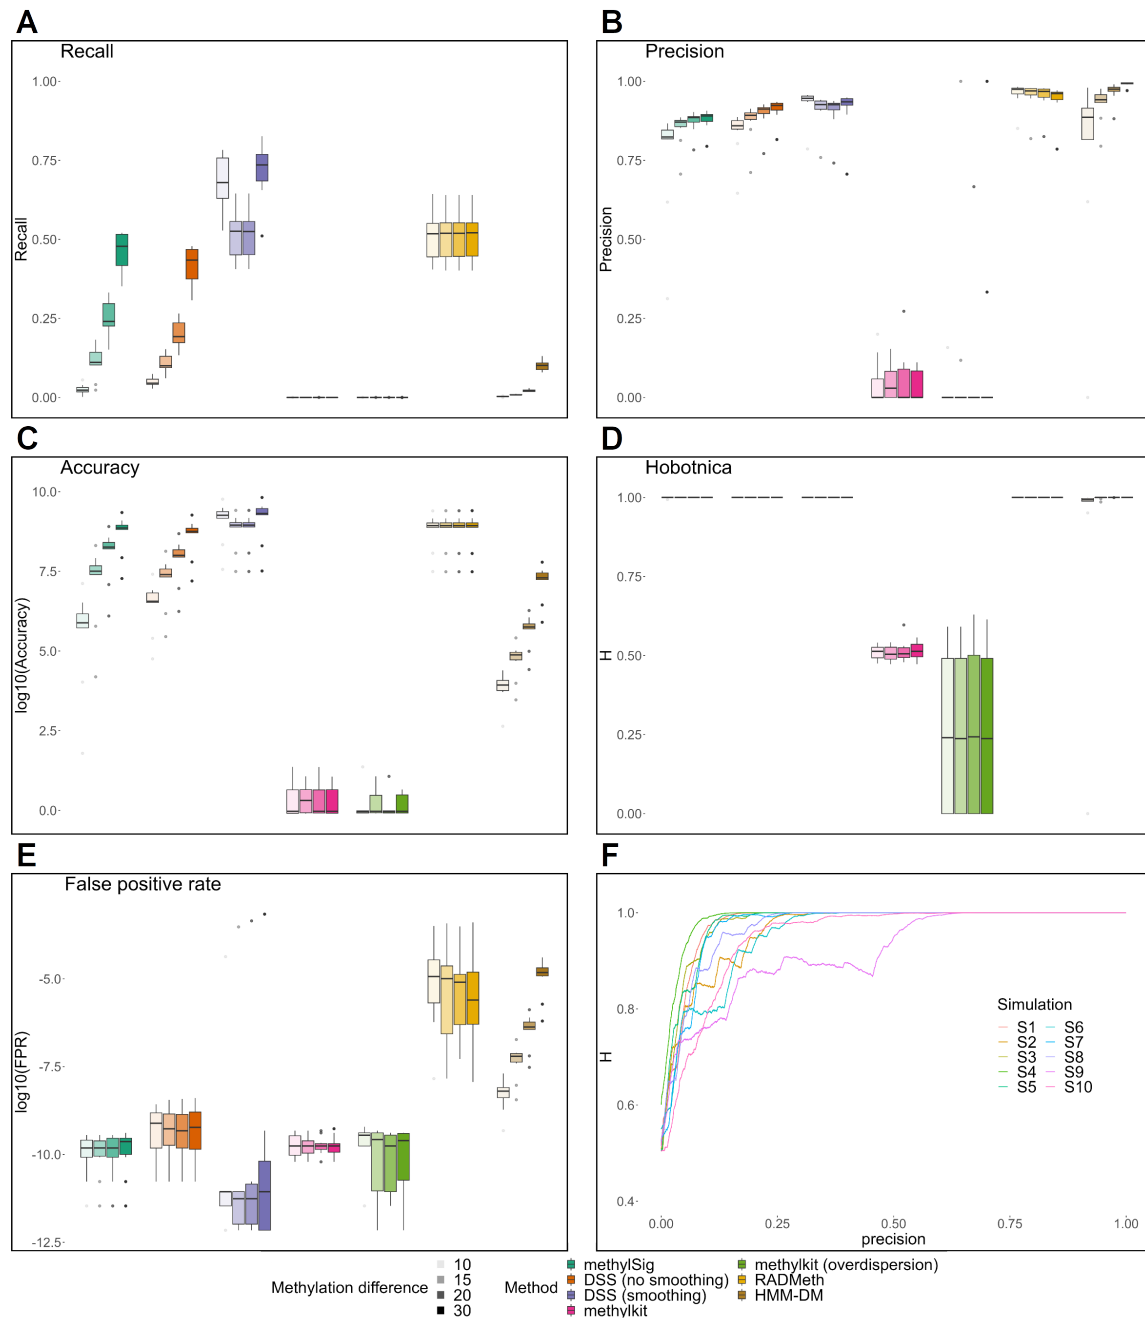

Supplementary Figure S21: Results for DM analysis on simulated data (the first group of datasets simulated with default parameters: (A): Recall, (B): Precision, (C): Accuracy for signatures produced from datasets simulated with methylation differences (D): Hobotnica for signatures produced from datasets simulated with methylation differences. (E): False positive rate for signatures obtained after permuting sample labels for each simulated dataset. (F): Dependence of the H-score on the proportion of true positive DMC included in the signature. A signature had the same length as a ground truth signature for each simulation with an average difference in methylation levels of 0.1.

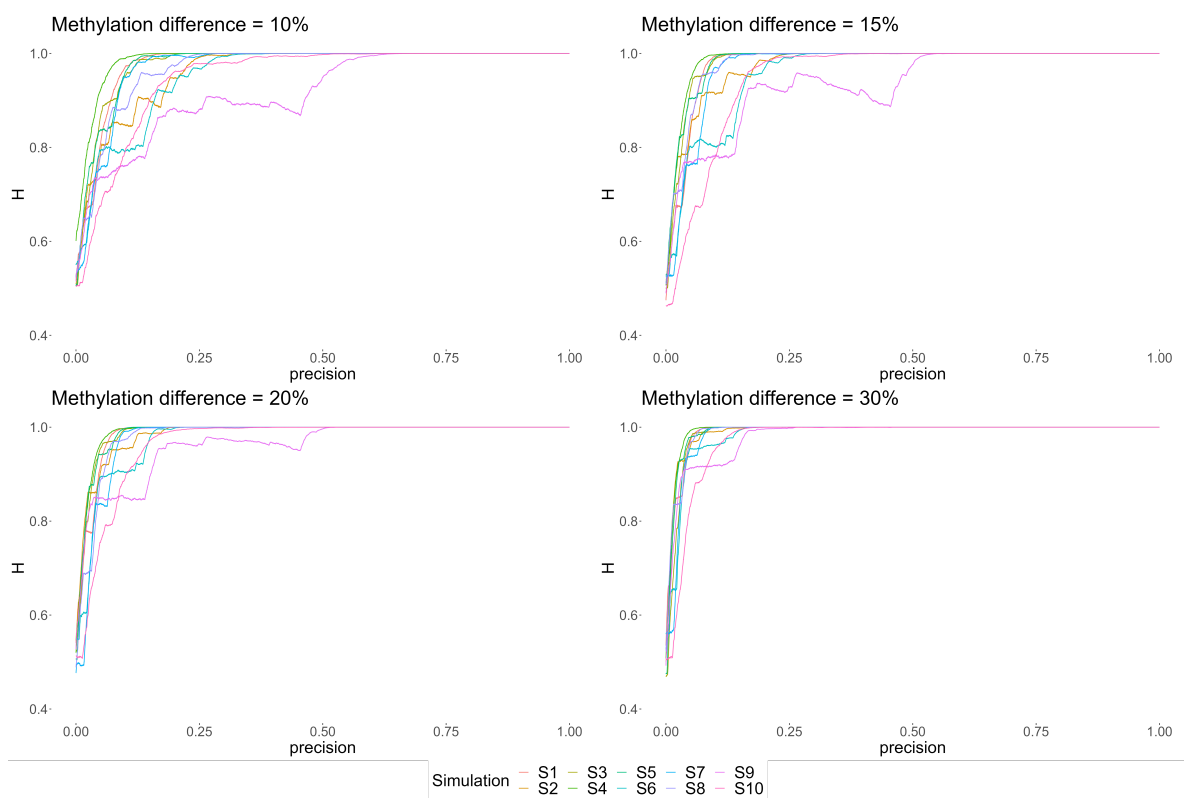

Supplementary Figure S22: Dependence of the H-score on the proportion of true positive DMC included in the signature, the first group of datasets. A signature had the same length as a ground truth signature for each simulation.

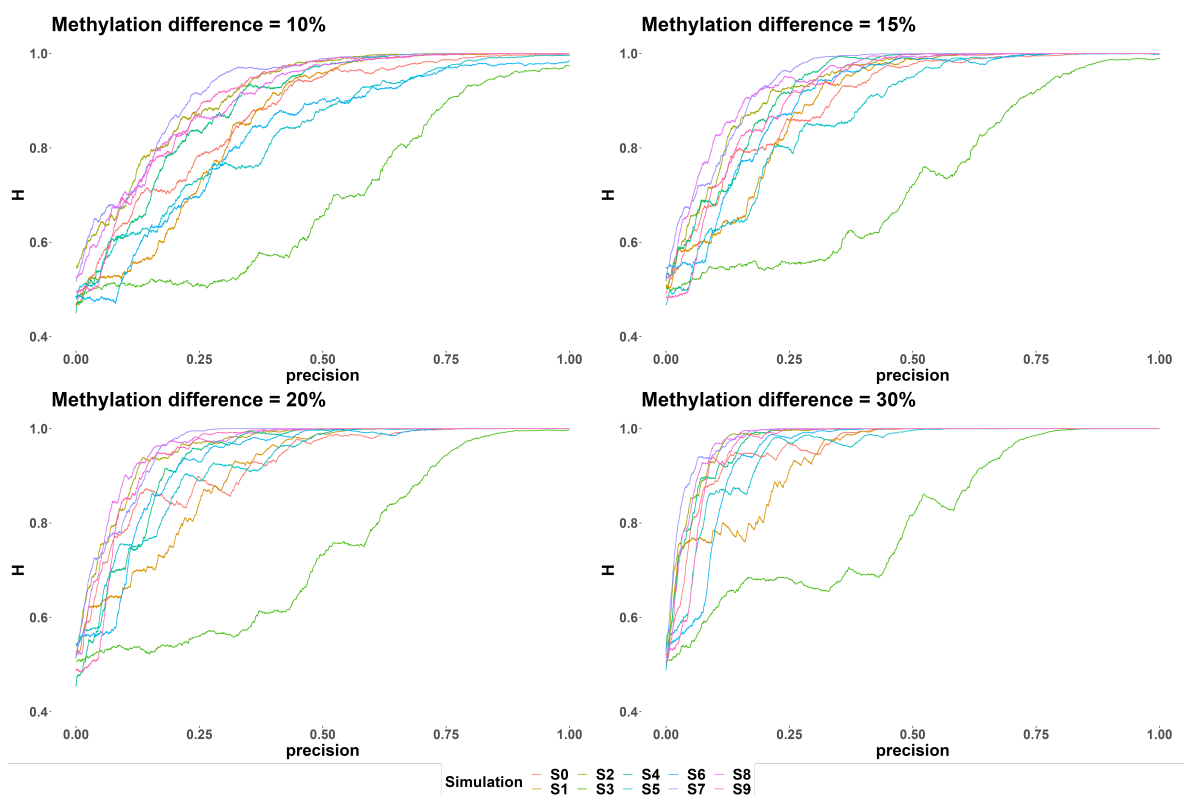

Supplementary Figure S23: Dependence of the H-score on the proportion of true positive DMC included in the signature, the second group of datasets. A signature had the same length as a ground truth signature for each simulation.

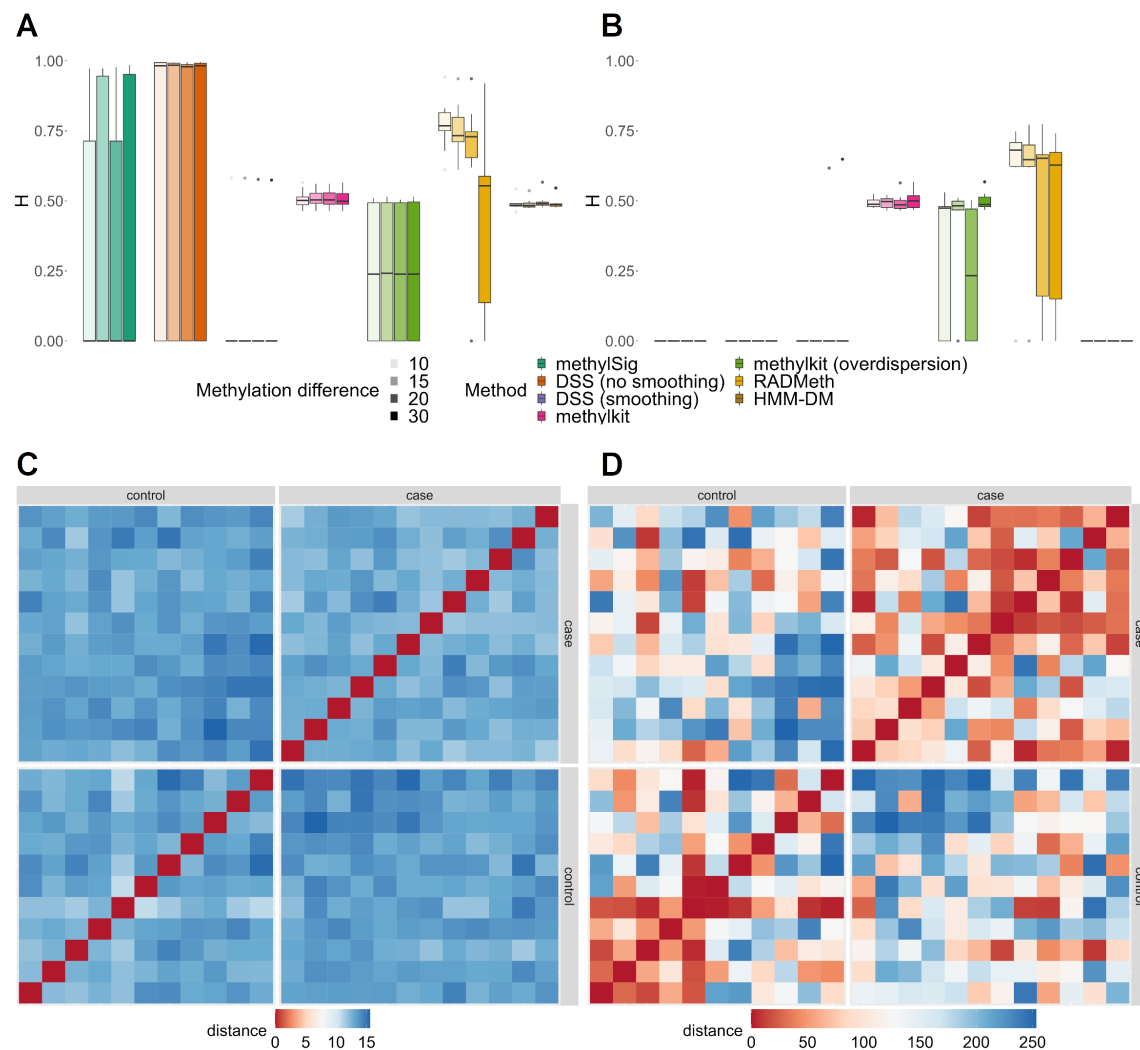

Supplementary Figure S24: Hobotnica calculation for label permutation (**A**): H-scores for label permutation signatures, the first group of datasets (**B**): H-scores for label permutation signatures, the second group of datasets (**C**): The distances between the vectors of methylation levels for RADmeth signature, the second group of datasets, simulation 1, methylation difference 0.15 (H-score = 0.7224) (**D**): The ranks of distances for RADmeth signature, the second group of datasets, simulation 1, methylation difference 0.15.

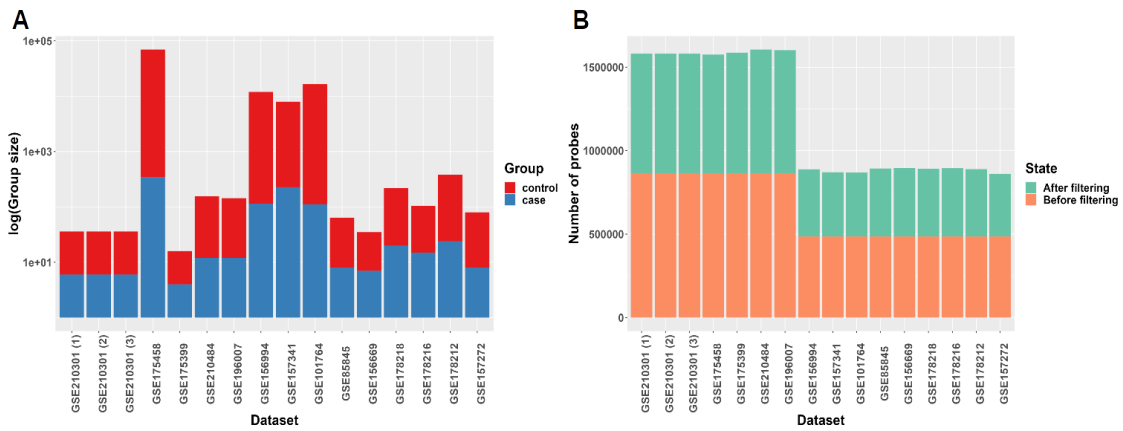

Supplementary Figure S25: Microarray data preprocessing (**A**): Dataset-wise per-group number of samples. (**B**): Number of methylation probes before and after filtering.

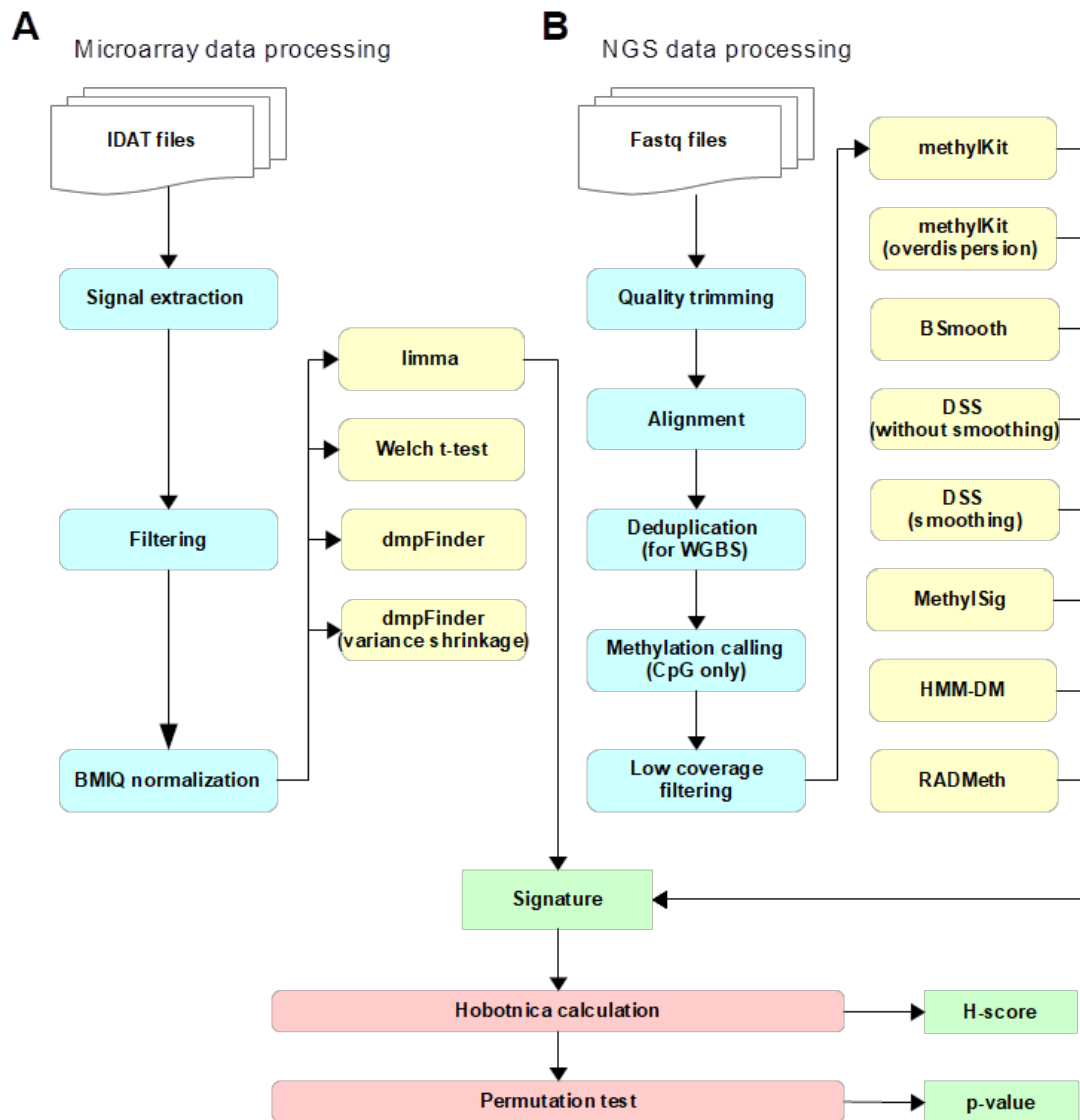

Supplementary Figure S26: Processing workflows for microarray and NGS data



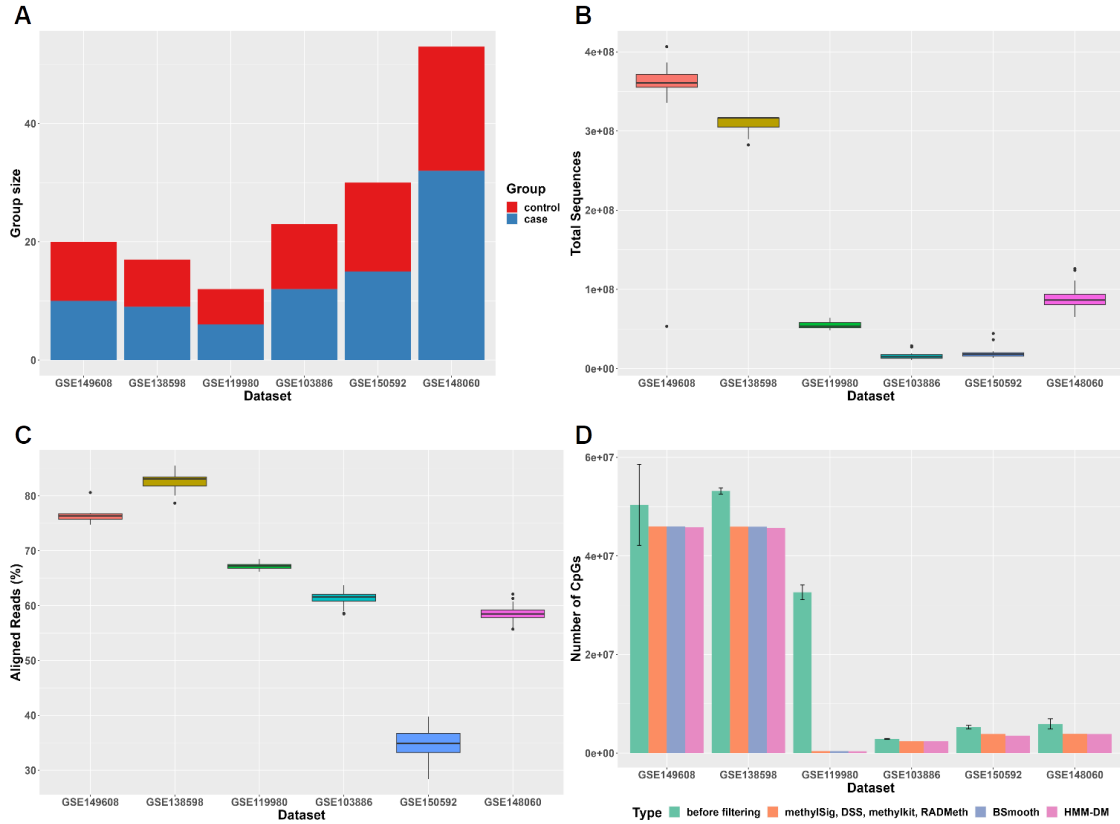

Supplementary Figure S27: NGS data preprocessing (**A**): Dataset-wise per-group number of samples. (**B**): Number of reads per FASTQ file. (**C**): Percent of uniquely aligned reads. (**D**): The number of CpG sites before filtering (green) and after filtering passed as an input to each DM method.
